1  
2  
3  
4  
5  
6  
7  
8  
9  
10  
11  
12  
13  
14  
15  
16  
17

**Transport Dynamics of MtrD: an RND multidrug efflux pump from *Neisseria gonorrhoeae***

Lauren Ammerman<sup>1,2,3\*</sup>, Sarah B. Mertz<sup>1,2,3</sup>, Chanyang Park<sup>1,3</sup>, and John G. Wise<sup>1,2,3\*</sup>

<sup>1</sup>Department of Biological Sciences, <sup>2</sup>Center for Scientific Computation, <sup>3</sup>Center for Drug Discovery, Design and Delivery; Southern Methodist University, Dallas, TX 75275

\* Corresponding authors

E-mail: [jwise@smu.edu](mailto:jwise@smu.edu), [lammerman@smu.edu](mailto:lammerman@smu.edu)

## 18 **Abstract**

19           Antibiotic-resistant gonorrheal infections are an urgent health concern. The MtrCDE system  
20 confers multidrug resistance to *Neisseria gonorrhoeae*, an obligate human pathogen, and the causative  
21 agent of the sexually-transmitted infection gonorrhea. The inner membrane pump MtrD effluxes a variety  
22 of hydrophobic and amphiphilic substrates and thereby confers resistance to a multitude of antibiotics.  
23 Using a combination of free and directed Molecular Dynamics (MD) simulations, we analyzed the  
24 interactions of MtrD with Azithromycin, an MtrD substrate and one of the last remaining courses of  
25 treatment for multidrug resistant gonorrhea. We also simulated the interactions between MtrD and  
26 Streptomycin, a non-substrate of MtrD. Using targeted MD (TMD) techniques and known conformations  
27 of MtrD homologues, we guided MtrD through the conformational changes of a putative transport cycle by  
28 applying small forces to  $\alpha$ -carbons of the protein backbone; forces were not applied to Azithromycin or to  
29 Streptomycin. In our TMD experiments, we observed the transport of Azithromycin (in three possible  
30 protonation states) and the rejection of Streptomycin. To supplement our findings, we then demonstrate the  
31 spontaneous diffusion of Azithromycin through the periplasmic cleft in long time-scale, unbiased MD  
32 simulations. Our findings support the hypothesis that the transition from ‘Binding’ to ‘Extrusion’ is an  
33 energy requiring step in the transport process. Our data also suggest that multiple binding modes, and  
34 potentially multiple residue contact pathways, exist within the periplasmic cleft of MtrD, even for bulky  
35 substrates. To our knowledge, this is the first computational demonstration of substrate transport, and non-  
36 substrate rejection, by MtrD.

37

## 38 Introduction

39 The gram-negative diplococcus *Neisseria gonorrhoeae* is responsible for the sexually transmitted  
40 infection (STI) Gonorrhea, and with over 87 million cases of Gonorrhea reported worldwide, antibiotic  
41 resistance in *N. gonorrhoeae* is a global health concern [1, 2]. *N. gonorrhoeae* is an obligate human  
42 pathogen that can cause severe reproductive and general health complications, if left untreated [2]. The  
43 number of effective antibiotics against *N. gonorrhoeae* is dwindling, and for multidrug resistant gonorrheal  
44 infections, only one recommended treatment remains – a combination treatment with the antibiotics  
45 ceftriaxone and azithromycin [2]. Unfortunately, a strain of *N. gonorrhoeae* with resistance to both  
46 azithromycin and ceftriaxone was detected in 2018 [3]. It remains increasingly important to understand and  
47 target the mechanisms that confer antibiotic resistance to *N. gonorrhoeae*.

48 Gram negative pathogens like *N. gonorrhoeae* have evolved several intricate mechanisms to  
49 overcome antimicrobial attack, and among the most effective are the resistance, nodulation and cell-division  
50 (RND) efflux systems [4]. These tripartite protein complexes consist of an efflux pump embedded in the  
51 inner membrane, a channel that passes through the outer membrane, and a periplasmic adaptor that connects  
52 the pump and channel through the periplasmic space. While four efflux pump systems have been identified  
53 in *N. gonorrhoeae* – MtrCDE, MacAB, NorM, and FarAB [5], the best characterized system is the multiple  
54 transferrable resistance, MtrCDE system, which consists of the MtrD inner membrane pump, the MtrC  
55 periplasmic adaptor, and the MtrE outer membrane channel [6-8]. A member of the HAE (Hydrophobic  
56 and Amphiphilic Efflux) family, MtrD exports bile salts, antimicrobial peptides, dyes,  $\beta$ -lactams, and  
57 macrolides [7, 9]. Overexpression of MtrCDE contributes significantly to clinical levels of macrolide  
58 resistance in *N. gonorrhoeae* [8, 10]. In mouse infection models, expression of active MtrCDE has been  
59 shown to be critical for gonococcal survival [11, 12]. Lastly, mutations in the drug binding region of MtrD  
60 are correlated with changes in antibiotic resistance in *N. gonorrhoeae* [9]. Given its importance in virulence  
61 and multiple antibiotic resistances, the MtrD efflux pump remains a promising target for the development  
62 of therapeutics.

63 MtrD assembles as a homotrimer, with each protomer consisting of a large periplasmic domain and  
64 12 transmembrane helices [6, 13] (Fig 1A). The periplasmic domain contains the periplasmic cleft, which

65 is responsible for the capture and extrusion of substrates, as well as the docking domain that interfaces with  
66 MtrCE (Figure 1B). The periplasmic cleft is further divided into the PN1, PN2, PC1, and PC2 domains;  
67 these create the proximal and distal multidrug binding sites (also known as the Access Pocket and the Deep  
68 Pocket, respectively), and are bisected by a flexible and conserved G-Loop (Fig 1C). The transmembrane  
69 helices house a highly conserved residue network that utilizes the proton-motive-force across the bacterial  
70 plasma membrane to power the pump [6] (Fig 1D). Changes in the protonation state(s) of these residues are  
71 thought to result in shearing motions of the TM helices, which correlate with peristaltic motions of the  
72 periplasmic cleft and thereby facilitate the movement of a substrate through the cleft [14, 15]. Substrates of  
73 large molecular weight are thought to bind first to the proximal binding site in the Access Pocket, and then  
74 second to the distal binding site in the Deep Pocket, before extrusion occurs through the funnel created by  
75 the docking domains of the homotrimer [6, 13]. The composition of the proximal and distal binding sites  
76 has been defined by some mutational studies (which identified residues 714 and 823 as important for  
77 macrolide recognition [13] and by co-crystal structures of erythromycin [16]. The transmembrane helices  
78 of each protomer house the highly conserved proton-relay-network (PRN, Fig 1D) [13].

79

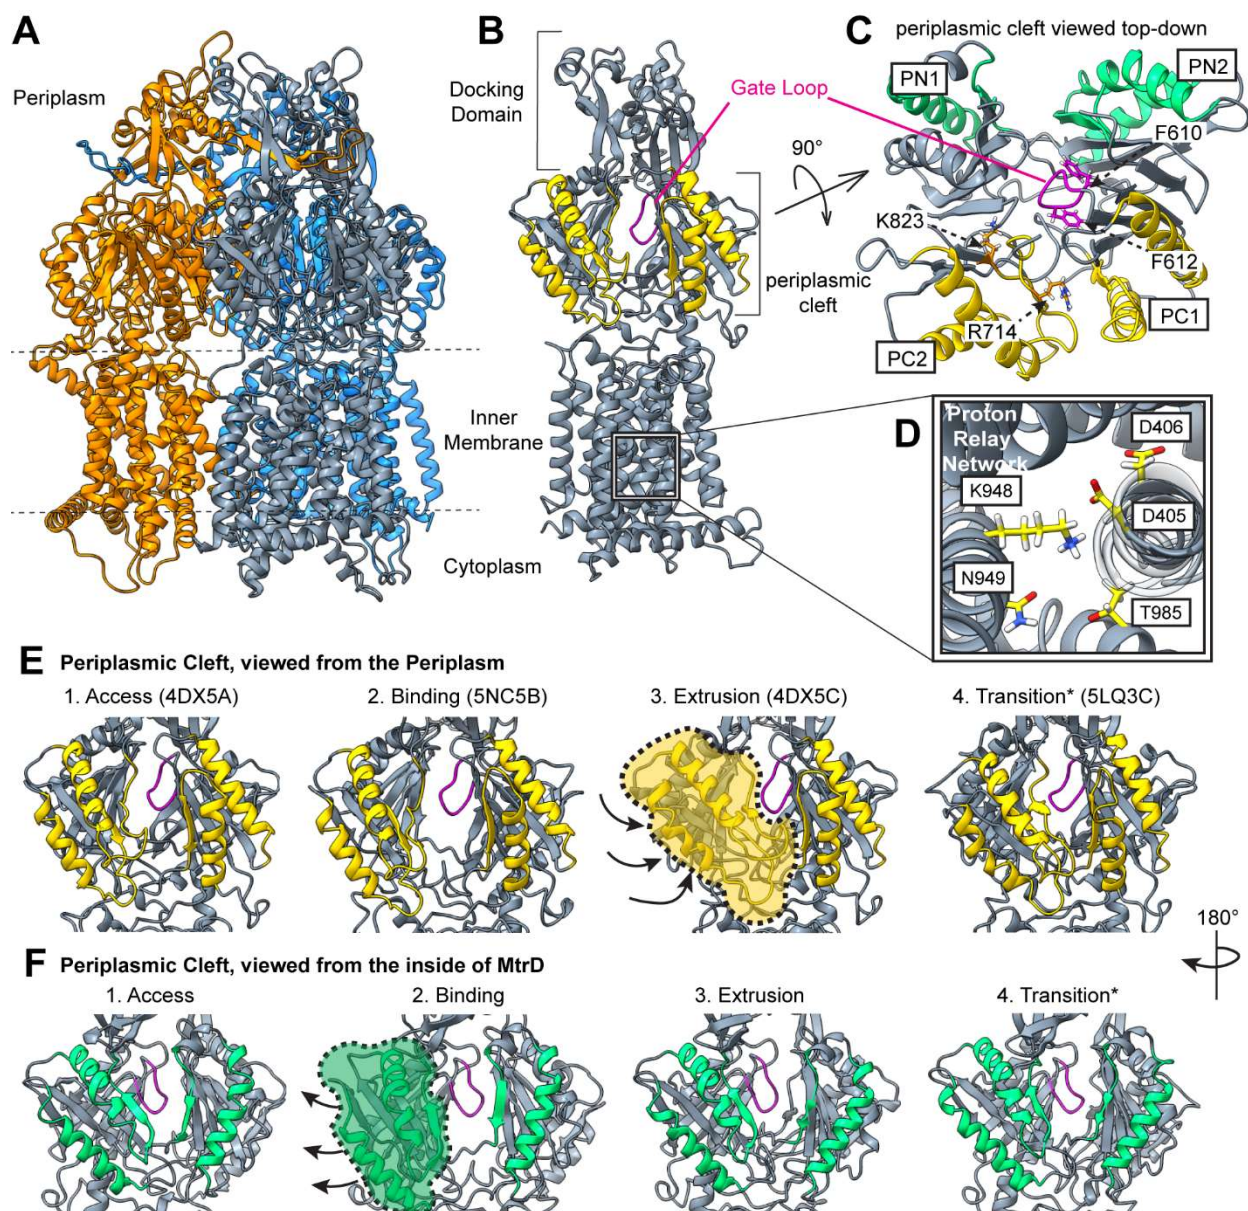

80  
 81 **Fig 1. The MtrD Efflux Pump from *Neisseria gonorrhoeae*.** (A) The MtrD homotrimer with subunits  
 82 colored orange, gray and blue. (B) An MtrD monomer with helices of the Access Pocket in yellow and the  
 83 G-Loop in magenta. (C) The periplasmic cleft viewed as if looking from the periplasm towards the inner  
 84 inner membrane; helices of the Access Pocket in yellow, helices of the Deep Pocket in green, G-Loop in magenta.  
 85 K823 and R714 may contribute to macrolide recognition (in orange sticks), and F612 and F610 may  
 86 facilitate substrate selectivity [13]. (D) The Proton Relay Network. (E) The Access Pocket viewed from  
 87 the periplasm; arrows show how PC2 (shaded yellow) closes during the transport cycle. (F) The Deep  
 88 Pocket viewed from the central pore; arrows show how PN2 (shaded green) opens during the transport  
 89 cycle. Stages of the transport cycle are labeled Access (also ‘Loose’), Binding (‘Tight’), Extrusion (‘Open’),  
 90 and Intermediate with the corresponding crystal structure of the MtrD homologue AcrB (5NC5, 4DX5) or  
 91 CmeB (5LQ3) in parentheses [6, 17]. Helices of the Access or Deep Pockets are colored differentially to  
 92 aid in the visualization of conformational changes during the transport process.  
 93

94 To transport a substrate, it is thought that MtrD undergoes a sequence of conformational changes,  
 95 resulting in shifting of its transmembrane helices and what might be thought of as a peristalsis-like motion

96 of the Drug Binding Pocket (Figs 1E-F,S1). Several distinct conformations of RND pumps have been  
97 identified by structural studies. When these conformations are sequenced in an order that may make sense  
98 in terms of a catalytic cycle, they are (1) ‘Access/Loose’, (2) ‘Binding/Tight’ (3) ‘Extrusion/Open’, and  
99 potentially a (4) Resting/Intermediate’ conformation, which may be a transition structure from Extrusion  
100 back to Access (Fig 1E,F) [13, 17-20]. Substrate-free MtrD adopts a symmetrical conformation with each  
101 protomer in the Access state [6]. Upon the binding of a transport substrate to an Access protomer, the trimer  
102 adopts an asymmetric conformation in which each of the three protomers adopts one of the conformational  
103 states – Access, Binding, or Extrusion [13, 18]. During the transition from Access to Binding, the substrate  
104 is thought to move from the Access Pocket to the Deep Pocket [13, 14]. Each monomer of MtrD  
105 subsequently cycles from Access, to Binding, to Extrusion in a functional rotation mechanism [14]. It has  
106 been shown that the characteristics of the Drug Binding Pocket may contribute to the substrate specificity  
107 of the pump, and that some of these features change during the transport process [13, 21]. While these  
108 known conformational changes provide a framework for understanding the overall movement of the protein  
109 during a catalytic transport cycle, the process by which these conformations and conformational changes  
110 result in the recognition, movement and extrusion of a substrate is not well understood.

111 To understand the process of drug transport by MtrD, we simulated the interactions between wild-  
112 type MtrD and two antibiotics: azithromycin, a substrate of MtrD, and streptomycin, a non-substrate of  
113 MtrD [7, 9]. Through a combination of free and directed Molecular Dynamics (MD) simulations, we  
114 simulated a putative dynamic efflux cycle using the known conformations of MtrD homologues as targets.  
115 In our Targeted Molecular Dynamics (TMD) simulations, small forces were applied to a subset of  $\alpha$ -carbons  
116 of the MtrD backbone, but not to any other atoms of the protein or to the ligands of interest. Since substrates  
117 are thought to bind sequentially to the proximal and distal binding sites in the periplasmic cleft [6], we  
118 tested three start sites for each ligand – a proximal site, a distal site, and a site in-between the proximal and  
119 distal sites. To account for the different protonation states of azithromycin that may occur at physiological  
120 pH, we simulated each of the three states; it should be noted that only one protonation state of streptomycin  
121 occurs at physiological pH. Lastly, we tested the effect of including a fourth Intermediate conformation in  
122 the sequence after the known Access, Binding, and Extrusion states. To confirm our findings in these short

123 timescale, non-equilibrium simulations, we performed a 1.5  $\mu$ s equilibrium simulation of azithromycin and  
124 MtrD. This long time-scale simulation was performed using AMBER18 and the pmemd.cuda-DPPF  
125 molecular dynamics engine [22, 23]. All TMD experiments were performed using NAMD with  
126 CHARMM36 force fields [24-27].

127         In the TMD simulations, we observed the transport of azithromycin and the rejection of  
128 streptomycin by MtrD. We show that the molecular landscape of the periplasmic cleft changes dynamically  
129 to facilitate substrate discrimination, transport and extrusion. In contrast to results from crystal structures  
130 of the MtrD homologue AcrB and cryo-EM structures of MtrD<sub>CR103</sub>, a variant that confers elevated  
131 azithromycin resistance, azithromycin was not observed in our TMD simulations to interact with residues  
132 of the putative distal binding site as expected, but took an alternate transport pathway mediated by water  
133 and polar interactions [13, 16]. In our TMD simulations, we also observed that including a putative fourth  
134 Intermediate structure increases the distance that azithromycin moves through MtrD. In an unconstrained  
135 1.5  $\mu$ s MD simulation (biasing forces were not applied) of azithromycin-bound MtrD in the Access  
136 conformation, we observed the spontaneous movement of azithromycin past the G-Loop and into the Deep  
137 Pocket. In this long timescale simulation, we note that the movement of azithromycin, and conformational  
138 changes of the periplasmic cleft, occurred in the absence of any biasing forces or changes to the Proton  
139 Relay Network. Lastly, to explore the potential role of the membrane fusion protein MtrC, we built a full  
140 MtrCDE complex using a combination of known structures and molecular modeling.

141         Taken together, our data suggest that multiple pathways through the periplasmic cleft may exist —  
142 even for bulky macrolide substrates like azithromycin. Our data also indicate that MtrC may not play an  
143 active role in substrate capture and extrusion, but suggest that a unique feature of MtrD, the TM9 helix and  
144 TM9-TM10 linker, might play a role in the capture of amphiphilic substrates from the inner membrane-  
145 periplasmic interface. Lastly, our results support the hypothesis that the transition from Binding to  
146 Extrusion is an energy-requiring step in the transport process.

147

## 148 **Results**

149           Using Targeted Molecular Dynamics (TMD) simulations directed by known, low energy  
150 conformations derived from biophysically determined structures of MtrD homologues, we simulated the  
151 putative catalytic transport cycle of MtrD by applying small forces to the  $\alpha$ -carbons of the protein backbone  
152 to move MtrD through a putative catalytic cycle (Figs 1E,F, S1). As ligands for our MD simulations, we  
153 chose the MtrD substrate, azithromycin (AZY), and the MtrD non-substrate, streptomycin (SRY) [7, 9].

154

### 155 **Positioning ligands to generate starting sites for TMD simulations**

156           The periplasmic cleft of MtrD can be divided into the Access Pocket and the Deep Pocket, which  
157 are composed of the PC1/PC2 domains and the PN1/PN2 domains, respectively (Fig 2A) [9, 16, 21]. Within  
158 the Access and Deep Pockets are the putative proximal and distal binding sites of MtrD (Fig 2A). The  
159 proximal binding site of MtrD has been proposed to consist of charged, polar and hydrophobic residues  
160 from PC1, PC2 and PN2, (Fig 2A,B), while the distal binding site is thought to be composed of mostly  
161 hydrophobic residues from PC1 and PN2 (Fig 2A,C) [6, 13]. Structures of the homologous RND transporter  
162 AcrB suggest that large substrates first bind to the Access Pocket, and then subsequently pass the G-Loop  
163 into the Deep Pocket during the transition from the Access to the Binding conformation (Fig 1C,E,F) [13,  
164 16]. It should be noted that there is an alternative entry site at the PC1/PN2 cleft for small, hydrophobic  
165 substrates (Fig 2A), but due to their large sizes, both SRY and AZY (~581 Daltons, ~749 Daltons,  
166 respectively) cannot utilize this alternative entry site and must enter the periplasmic cleft through the Access  
167 Pocket.

168           Structures of AcrB indicate that erythromycin, which is quite similar to AZY, may bind at the  
169 entrance of the periplasmic cleft [16]. As shown in Fig 2B and 2C, several residues of the MtrD proximal  
170 binding site (residues in orange) are conserved in AcrB, two of which (K714 and K823) are thought to  
171 contribute to recognition of macrolides like erythromycin and azithromycin [13]. Due to a dearth of  
172 structural data, the exact binding location of AZY or SRY in the proximal binding site of MtrD remains  
173 unclear [13]. It is reasonable to assume that AZY might interact with the same residues of the MtrD  
174 proximal site as erythromycin. However, as we discuss later in this paper, the Access Pocket – and the



175 proximal site within – are large enough to accommodate multiple binding modes of azithromycin, despite  
 176 its large size.  
 177

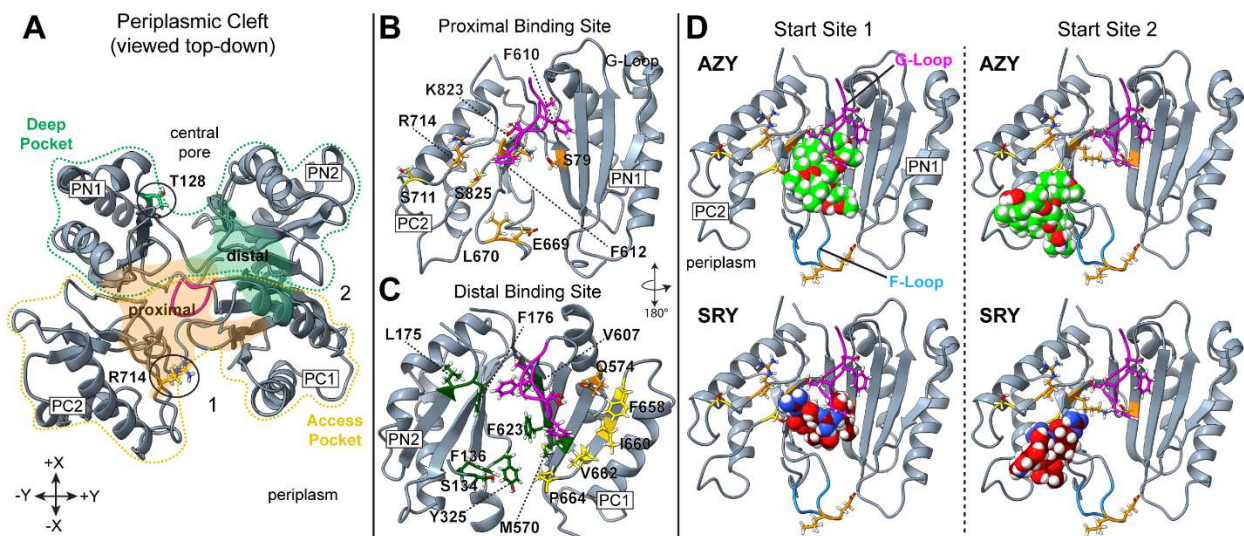

178  
 179 **Fig 2. The Multidrug Binding Sites and Ligand Starting Sites within the Periplasmic Cleft of MtrD.**  
 180 **A)** The periplasmic cleft shown from the top down. The Deep Pocket (green) and Access Pocket (yellow)  
 181 are outlined in dashed lines. The putative proximal and distal binding sites are shaded orange and green,  
 182 respectively. The two possible entry pathways are numbered 1) the main entry path, and the 2) the alternate  
 183 entry site that is only available to small substrates. **B)** The putative proximal binding site viewed from the  
 184 side. Residues that may be important for substrate selectivity are shown in yellow sticks; residues of the  
 185 proximal site that are conserved in AcrB are colored orange; the G-Loop is presented in magenta [13]. **C)**  
 186 The putative distal binding site; residues that may be important for substrate selectivity are yellow sticks,  
 187 proximal site residues that are conserved in AcrB are orange, distal site residues that are conserved in AcrB  
 188 are dark green; G-Loop is magenta [13]. **D)** Ligand starting sites for TMD simulations, AZY in lime green,  
 189 SRY in maroon.

190  
 191 In light of these characteristics of MtrD, and in order to generate reasonable starting positions of  
 192 transport substrates in the TMD simulations, we independently docked AZY and SRY to the periplasmic  
 193 cleft of MtrD using Autodock Vina [6, 28, 29]. For these experiments, docking search volumes sampled  
 194 the entire conformational space within the periplasmic cleft (S2 Fig). The resultant docking sites of SRY  
 195 and AZY are shown in Fig S3. Notably, the predicted docking poses for SRY and AZY clustered in the  
 196 center of the periplasmic cleft near the G-Loop with outliers at the extremes of the Access or Deep Pockets,  
 197 (S3 Fig). Our docking studies suggest that the periplasmic cleft in the Access conformation can  
 198 accommodate multiple potential binding modes of AZY and SRY, despite their large sizes. We selected  
 199 two poses from the resultant locations to serve as ligand “start sites” for the TMD simulations. In Site 1,  
 200 SRY or AZY associates with the G-Loop and interacts with residues of the proximal binding site (Fig 2D,

201 left panel). In Site 2, SRY or AZY is bound near the entrance of the cleft and interacts with the foremost  
202 residues of the proximal binding site (Fig 2D, right panel).

203

## 204 **Multiple protonation states of AZY are included in TMD simulations**

205 The promiscuity of RND transporters contributes significantly to their effectiveness in conferring  
206 antibiotic resistance [8, 9, 13]. Since RND transporters often possess wide substrate profiles, one question  
207 to be asked is whether the substrate profile of MtrD extends to different protonation states of the same  
208 substrate. At physiological pH (between 7 and 7.5), three potential protonation states of AZY are possible:  
209 an uncharged form (AZY<sub>neu</sub>); a singly protonated, positively charged form (AZY<sub>h1</sub>); and a doubly  
210 protonated, positively charged form (AZY<sub>h2</sub>) (S4 Fig) [30, 31]. In contrast, at physiological pH values, only  
211 one protonation state of SRY is likely to occur (S4 Fig). To investigate how each of these forms might  
212 interact with MtrD, we included each of the possible protonation states of AZY our TMD simulations (see  
213 Methods). Additionally, we note that the ionizable residues of MtrD are protonated (by default) according  
214 to a physiological pH of 7.4 in our MD simulations with both AMBER and NAMD. Histidines, the only  
215 residue that significantly ionizes at physiological pH of 7.4, default to protonation of the  $\epsilon$  nitrogen in both  
216 NAMD and AMBER simulations [32, 33].

217

## 218 **Defining “transport” in TMD simulations**

219 Since large substrates are thought to travel from the Access Pocket to the Deep Pocket [6], it was  
220 of interest to quantify this movement, if any, during TMD simulations. We quantified ligand movement in  
221 two ways: first, we calculated the root mean squared deviation (RMSD) of the putative transport substrate  
222 from its starting position throughout the simulation. In our simulated system, the protein is oriented such  
223 that substrates, when moving in the transport direction away from the Access Pocket, move on a diagonal  
224 in the X-Y plane. Thus, RMSD<sub>ligand</sub> provides an approximation of ligand movement without necessitating  
225 quantification of movement along two axes. However, since RMSD calculations do not differentiate  
226 translational movement from rotational movements with little or no translational displacement, we also  
227 calculated the distance between the ligand’s center of mass (Ligand<sub>COM</sub>) and specific “checkpoint” residues

228 on the interior surface of the periplasmic cleft. For this secondary method of quantification, we chose the  
229  $\alpha$ -carbons of R714 in the entrance of the periplasmic cleft, and T128 at the exit of the cleft, as our  
230 “checkpoints” (Fig 2A). Both R714 and T128 were chosen solely based upon their positions and overall  
231 movement within the periplasmic cleft interior – both residues primarily move on an axis perpendicular to  
232 the direction of transport, and exhibit an overall RMSD of  $\sim 2.5$  Å. If a ligand is transported, the  
233  $\text{Ligand}_{\text{COM}}:\text{R714}_{\alpha\text{-carbon}}$  distance should increase over time, and the  $\text{Ligand}_{\text{COM}}:\text{T128}_{\alpha\text{-carbon}}$  distance should  
234 decrease over time (Fig 2A). In our simulations, we defined a ligand as “transported by MtrD” if, by the  
235 end-of-simulation, all three of the following conditions were met: the distance between the  $\text{Ligand}_{\text{COM}}$  and  
236  $\text{R714}_{\alpha\text{-carbon}}$  was greater than or equal to 18 Å, the distance between the  $\text{Ligand}_{\text{COM}}$  and  $\text{T128}_{\alpha\text{-carbon}}$  was less  
237 than or equal to 15 Å, and the ligand RMSD was at least 8.5 Å.

238

### 239 **Azithromycin is transported by MtrD in TMD simulations**

240 Using known conformations of MtrD homologues as targets to mimic a putative efflux cycle of  
241 MtrD (S1 Fig), we performed 20 independent TMD simulations per protonation state of AZY at Site 1 and  
242 Site 2 (n = 20 TMD simulations per ligand, per start site). Based upon the previously defined distance  
243 cutoffs between  $\text{Ligand(s)}_{\text{COM}}$  and  $\text{R714}_{\alpha\text{-carbon}}$  or  $\text{T128}_{\alpha\text{-carbon}}$ , we divided the simulation outcomes into two  
244 clusters: Transported (Fig 3A-C) and Non-Transported substrates (S5 Fig). For each protonation state of  
245 AZY, we observed the following frequencies of transport:  $\text{AZY}_{\text{neu}}$  was transported in 12/20 simulations;  
246  $\text{AZY}_{\text{h1}}$  was transported in 3/20 simulations;  $\text{AZY}_{\text{h2}}$  was transported in 6/20 simulations. Within the “Non-  
247 Transport” cluster of AZY trajectories, we observed two possible outcomes: 1) AZY remained in the same  
248 relative position straddling the G-Loop, or 2) AZY traveled into the Deep Pocket but remained closely  
249 associated with the G-Loop (S5 Fig). Examples of a both Transport and Non-Transport trajectories are  
250 shown in S1 Movie.

251

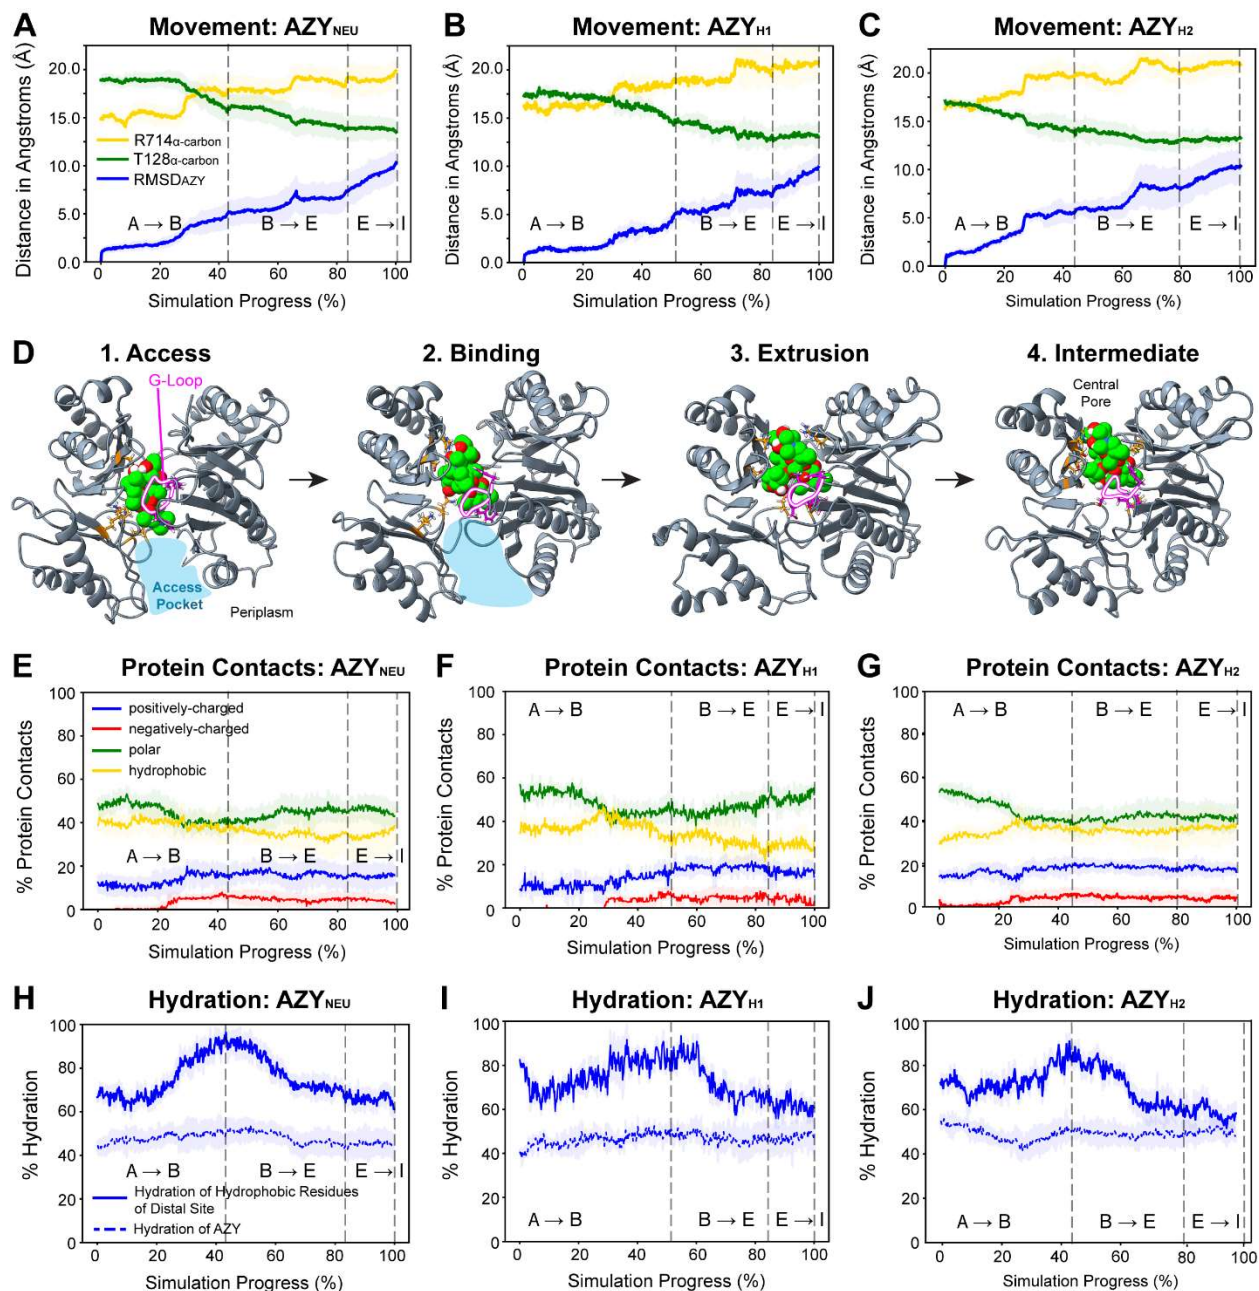

252

253 **Fig 3. Transport of Azithromycin by MtrD in TMD Simulations.** Panels A-C) show the RMSD of AZY  
 254 from its starting position over time, and also the distance between the center of mass of AZY and the  $\alpha$ -  
 255 carbons of T128 or R714 in the periplasmic cleft. These movements were used to define ‘Transport’ or  
 256 ‘Non-Transport’ of AZY in TMD simulations. D) is a representative trajectory that shows transport of AZY  
 257 (lime green) through the periplasmic cleft, along with the accompanying conformational changes of a  
 258 putative transport cycle. A transparent blue overlay shows the approximate size of the Access Pocket in the  
 259 Access and Binding conformations, as the Access Pocket is closed in Extrusion and Intermediate. The G-  
 260 Loop is outlined in magenta for visibility. E-G) show the chemical nature of protein-AZY contacts over  
 261 the course of the simulation; the majority are either polar or hydrophobic. H-J) show the hydration of the  
 262 solvent accessible surface area (SASA)<sub>AZY</sub>, or of the hydrophobic residues in the putative distal binding site  
 263 in the Deep Pocket, over the course of the simulation (see Methods). Data in Panels A-C, and E-I) represent  
 264 the mean  $\pm$  one standard deviation in shading. Dashed grey lines indicate when MtrD reaches a structural  
 265 checkpoint. MtrD begins in the ‘A’ (Access), conformation, and transitions to the following: ‘B’ (Binding),  
 266 ‘E’ (Extrusion), and ‘I’ (Intermediate); timepoints between the dashed lines indicate structural transitions  
 267 between two states.

268

## 269 **AZY travels farther when a fourth “intermediate” state is simulated**

270 In addition to the known Access, Binding and Extrusion conformations, a fourth potential ‘Resting’  
271 structure was identified in CmeB *Campylobacter jejuni*; CmeB shares a 28.7% sequence identity with MtrD  
272 [17] (Figs 1 E,F S1). The Resting conformation was classified by 1) the closure of the Access Pocket to the  
273 periplasm, and 2) the positioning of the transmembrane helices, which mimics that of the Extrusion  
274 conformation [17]. Su et al. observed that the Resting conformation occurred in the absence of a transport  
275 ligand and was most stable in the absence of a proton motive force (PMF) [17]. Because of this data, Su et  
276 al. postulated that this conformation could be a low-energy resting conformation of the transporter. It should  
277 be noted, however, that a proton gradient across the plasma membrane is present in actively reproducing  
278 Gram-negative bacterial cells [34]. Furthermore, in our TMD simulations, we found that the inclusion of  
279 this conformation as the last step of the TMD sequence resulted in the additional movement of AZY in the  
280 transport direction (Fig 3A-C, “E → I”). Consequently, we hypothesize that the Resting state likely  
281 participates in transport as a potential intermediate between Extrusion and Access, and may even serve to  
282 position particularly bulky substrates for disassociation. We refer to this conformation as an “Intermediate”  
283 structure, as it may be an intermediate conformation that occurs during the shift from Extrusion back to  
284 Access (Fig 3, abbreviated as “I”).

285 An additional consideration for our TMD simulations is the relationship between conformational  
286 changes of the periplasmic cleft and the extrusion of a ligand into the funnel domain. Specifically, it is  
287 unclear whether (1) conformational changes of the periplasmic cleft squeeze the substrate into the funnel  
288 domain, or (2) the monomer adopts the Extrusion conformation, thereby maneuvering the ligand into a  
289 favorable position for disassociation, and then “waits” for the ligand to disassociate. Since forces were not  
290 applied to the ligands in our simulations, and the exact timing of substrate release is unknown, we were  
291 uncertain if we would observe disassociation of the ligand in our TMD simulations. Therefore, to prepare  
292 for the possibility that we may observe AZY release in our simulations, we modeled a full putative catalytic  
293 transport cycle, including this fourth putative Intermediate intermediary, but used it as the last step in our  
294 TMD cycle (S1 Fig).

295 In the TMD simulations performed here, we did not observe the movement of AZY in any  
296 protonation state into the funnel domain. This is not surprising, since an earlier MD computational study  
297 with the AcrB substrate Doxorubicin relied upon steered MD forces to pull Doxorubicin from the distal  
298 binding site, thereby necessitating dissociation [35]. However, as mentioned previously, with the inclusion  
299 of the putative Intermediate state in our target sequence, we observed that AZY traveled farther through the  
300 Deep Pocket (2.5 - 3 Å increase in distance traveled) and was thus in a better position for  
301 release/dissociation events to occur (Fig 3D, 'Intermediate').

302

### 303 **Hydration of AZY mediates transport and outcompetes potential hydrophobic** 304 **interactions**

305 Large substrates, particularly macrolides like AZY, are thought to bind at the putative distal site  
306 (formed by PN2, PC1, and the G-Loop) when the monomer is in the Binding state, and protein-macrolide  
307 contacts are thought to be dominated by hydrophobic interactions (Fig 2C) [9, 13, 16, 35]. The cryo-EM  
308 structure of MtrD<sub>CR103</sub>, an MtrD variant which confers elevated AZY resistance, contained erythromycin  
309 bound at the putative distal site. In this structure (PDB ID 6VKT, chain B), 71% of protein-erythromycin  
310 contacts were contributed by hydrophobic residues, and 21% and 7% by polar or positively charged  
311 residues, respectively [13]. Of these protein-erythromycin contacts, 43% were contributed by PN2, 43% by  
312 PC1, and 14% by the G-Loop; additionally, the residues involved are conserved in both wild-type MtrD  
313 and MtrD<sub>CR103</sub>. Therefore, when MtrD was approaching or in the Binding conformation in our simulations,  
314 we expected that AZY would interact closely with the putative distal binding site and primarily with PN2,  
315 PC1 and the G-Loop. As expected, when AZY was transported, we found that the G-Loop accounted for a  
316 significant share (21-30%) of protein-AZY contacts at the Binding conformation (Table 1). However, we  
317 observed that most of the protein-AZY contacts (39-43% at Binding) were contributed by PN1, whose role  
318 in substrate extrusion has not been previously studied, and that PN2 and PC1 contributed only a small  
319 fraction of contacts, 6 to 15% and 0.6 to 7%, respectively. (Table 1).

320

| Transport Cluster     |              | Percent (%) of Protein-Ligand Contacts Contributed by Domain or Region |            |            |             |            |            |            |             |
|-----------------------|--------------|------------------------------------------------------------------------|------------|------------|-------------|------------|------------|------------|-------------|
|                       | Structure    | G-Loop                                                                 | PC1        | PC2        | PN1         | PN2        | F-Loop     | AP         | DP          |
| AZY <sub>neu</sub>    | Access       | 17.0 ± 2.5                                                             | 13.0 ± 4.0 | 38.0 ± 4.1 | 29.3 ± 4.4  | 0.4 ± 0.4  | 2.3 ± 1.0  | 51.0 ± 3.1 | 29.7 ± 4.6  |
|                       | Binding      | 27.0 ± 4.3                                                             | 2.4 ± 2.1  | 9.8 ± 8.3  | 39.8 ± 8.7  | 5.9 ± 4.6  | 15.1 ± 6.0 | 12.2 ± 7.7 | 45.7 ± 10.0 |
|                       | Extrusion    | 21.8 ± 3.0                                                             | 3.4 ± 3.5  | 4.9 ± 3.7  | 47.1 ± 6.6  | 15.5 ± 8.1 | 7.4 ± 5.6  | 8.3 ± 2.9  | 62.6 ± 8.5  |
|                       | Intermediate | 18.6 ± 3.3                                                             | 2.6 ± 2.8  | 4.1 ± 4.0  | 46.9 ± 7.0  | 22.8 ± 9.4 | 5.0 ± 4.1  | 6.6 ± 3.5  | 69.7 ± 7.2  |
| AZY <sub>h1</sub>     | Access       | 16.8 ± 2.2                                                             | 13.3 ± 1.6 | 19.7 ± 1.2 | 41.1 ± 2.6  | 2.6 ± 0.3  | 6.4 ± 0.4  | 33.0 ± 2.5 | 43.8 ± 2.4  |
|                       | Binding      | 29.9 ± 4.2                                                             | 7.0 ± 5.0  | 1.8 ± 1.9  | 43.7 ± 4.3  | 8.4 ± 3.4  | 9.2 ± 8.8  | 8.8 ± 5.7  | 52.1 ± 1.8  |
|                       | Extrusion    | 27.3 ± 3.7                                                             | 5.7 ± 3.5  | 1.8 ± 1.3  | 41.7 ± 5.5  | 16.0 ± 5.9 | 7.5 ± 7.6  | 7.4 ± 4.2  | 57.7 ± 11.3 |
|                       | Intermediate | 25.2 ± 1.7                                                             | 6.0 ± 3.3  | 1.8 ± 1.5  | 44.0 ± 7.0  | 19.2 ± 5.3 | 3.7 ± 3.3  | 7.9 ± 4.8  | 63.2 ± 5.2  |
| AZY <sub>h2</sub>     | Access       | 19.6 ± 2.5                                                             | 0.6 ± 1.0  | 30.2 ± 2.0 | 44.2 ± 4.0  | 2.4 ± 1.2  | 3.1 ± 1.4  | 30.7 ± 2.3 | 46.6 ± 4.0  |
|                       | Binding      | 21.0 ± 3.5                                                             | 0.6 ± 1.3  | 8.6 ± 4.1  | 42.9 ± 5.4  | 16.0 ± 6.5 | 10.8 ± 8.5 | 9.2 ± 4.1  | 58.9 ± 9.6  |
|                       | Extrusion    | 19.8 ± 5.2                                                             | 0.0 ± 0.0  | 1.9 ± 3.0  | 43.4 ± 4.1  | 31.9 ± 7.5 | 3.1 ± 4.5  | 1.9 ± 3.0  | 75.3 ± 8.4  |
|                       | Intermediate | 22.6 ± 2.4                                                             | 0.1 ± 0.3  | 2.3 ± 2.6  | 41.6 ± 6.0  | 31.3 ± 7.7 | 1.9 ± 2.6  | 2.5 ± 2.7  | 72.9 ± 5.9  |
| Non-Transport Cluster |              | Percent (%) of Protein-Ligand Contacts Contributed by Domain or Region |            |            |             |            |            |            |             |
|                       | Structure    | G-Loop                                                                 | PC1        | PC2        | PN1         | PN2        | F-Loop     | AP         | DP          |
| AZY <sub>neu</sub>    | Access       | 18.2 ± 2.9                                                             | 14.4 ± 2.4 | 38.3 ± 2.7 | 26.2 ± 3.9  | 0.1 ± 0.3  | 2.8 ± 1.0  | 52.7 ± 3.7 | 26.3 ± 3.8  |
|                       | Binding      | 24.3 ± 6.7                                                             | 3.7 ± 4.9  | 25.0 ± 9.4 | 25.8 ± 11.0 | 0.0 ± 0.0  | 21.2 ± 4.7 | 28.6 ± 9.1 | 25.8 ± 11.0 |
|                       | Extrusion    | 18.1 ± 4.8                                                             | 6.0 ± 4.7  | 21.0 ± 8.7 | 32.2 ± 5.4  | 6.8 ± 6.5  | 15.9 ± 5.0 | 27.1 ± 9.0 | 39.0 ± 10.2 |
|                       | Intermediate | 17.9 ± 2.4                                                             | 5.1 ± 3.8  | 21.1 ± 7.1 | 35.1 ± 4.5  | 7.5 ± 6.5  | 13.3 ± 3.1 | 26.2 ± 8.1 | 42.6 ± 8.5  |
| AZY <sub>h1</sub>     | Access       | 16.3 ± 1.7                                                             | 14.4 ± 3.0 | 19.6 ± 1.3 | 40.2 ± 3.0  | 2.1 ± 0.5  | 7.4 ± 0.9  | 34.0 ± 2.9 | 42.2 ± 3.2  |
|                       | Binding      | 26.8 ± 5.4                                                             | 2.6 ± 2.3  | 12.0 ± 6.7 | 37.4 ± 9.7  | 4.2 ± 4.5  | 17.0 ± 5.0 | 14.6 ± 6.6 | 41.6 ± 10.8 |
|                       | Extrusion    | 23.4 ± 3.7                                                             | 3.6 ± 4.0  | 11.6 ± 8.2 | 37.0 ± 6.2  | 10.5 ± 7.5 | 14.0 ± 4.1 | 15.2 ± 9.6 | 47.4 ± 11.7 |
|                       | Intermediate | 21.8 ± 2.4                                                             | 3.2 ± 3.1  | 12.7 ± 7.6 | 36.5 ± 4.9  | 13.1 ± 6.9 | 12.6 ± 5.3 | 15.9 ± 8.2 | 49.7 ± 10.3 |
| AZY <sub>h2</sub>     | Access       | 19.8 ± 1.5                                                             | 0.3 ± 0.6  | 29.9 ± 2.7 | 43.2 ± 4.1  | 3.4 ± 1.6  | 3.2 ± 1.3  | 30.3 ± 2.9 | 46.7 ± 3.5  |
|                       | Binding      | 25.3 ± 9.1                                                             | 0.2 ± 0.7  | 15.0 ± 6.1 | 45.0 ± 11.5 | 5.4 ± 5.2  | 9.2 ± 5.3  | 15.2 ± 6.0 | 50.3 ± 10.5 |
|                       | Extrusion    | 20.8 ± 6.3                                                             | 0.0 ± 0.0  | 10.8 ± 3.1 | 43.5 ± 7.2  | 16.8 ± 5.6 | 8.0 ± 4.9  | 10.8 ± 3.1 | 60.4 ± 6.6  |
|                       | Intermediate | 18.4 ± 3.3                                                             | 0.2 ± 0.9  | 12.8 ± 4.7 | 45.3 ± 4.0  | 16.2 ± 5.6 | 7.1 ± 4.4  | 13.0 ± 4.7 | 61.5 ± 6.4  |

321  
 322 **Table 1. Percentage of Protein-AZY Contacts Contributed by Specific Domains of the MtrD**  
 323 **Periplasmic Cleft.** Contacts are defined as residues whose  $\alpha$ -carbon is within 4 Å of AZY at each timepoint  
 324 of the simulation. Individual domains of the periplasmic cleft are as defined in [13], and the % protein  
 325 contacts for the Access Pocket (PC1&PC2) and Deep Pocket (PN1&PN2) have also been calculated from  
 326 the mean contact value. Contact analysis was performed for trajectories in the “Transport” cluster using  
 327 VMD and analyzed with scripts in *Tcl* and python.  
 328

329 Based upon the structure of erythromycin-bound MtrD<sub>CR103</sub>, we also expected that the majority (~  
 330 70%) of protein-AZY contacts at Binding would be contributed by hydrophobic residues; instead, we found  
 331 that polar and hydrophobic residues each contributed ~40% of contacts (except for AZY<sub>h1</sub>, where polar  
 332 contacts outnumbered hydrophobic contacts) (Fig 3E-G). At Binding, this difference from the expected  
 333 value can be attributed to the share of contacts contributed by PN1, which are mostly polar in nature, and  
 334 the lack of (expected) contacts with the hydrophobic patch formed by PC1 and PN2. Here it is helpful to

335 note that, for the purposes of this work, “contacts” are defined as residues of MtrD within 4 Å of any atom  
336 of AZY at a particular point in the simulation. The diameter of a water molecule is  $\sim 2.8$  Å [36]. Thus, it is  
337 possible for a hydrophobic residue to be counted as a “contact” with AZY, but to also be separated from  
338 AZY by a layer of water, which would prevent a true hydrophobic interaction from occurring via the  
339 occlusion of water molecules between AZY and the residue of interest. To elucidate the nature of protein-  
340 AZY contacts, we calculated the percent hydration of the potential solvent accessible surface area (SASA)  
341 of AZY (in all protonation states) and of the hydrophobic residues of the putative distal site (formed by  
342 PC1/PN2) over the course of the TMD simulations (Fig 3H-J).

343         When AZY was transported, we observed that the  $SASA_{AZY}$  was  $\geq 45\%$  hydrated throughout  
344 transport. Notably, the SASA of the hydrophobic residues in the distal site ( $SASA_{\text{distal hydrophobic}}$ ) was  $\geq 60\%$   
345 hydrated throughout the entire simulation. During the Binding conformation, when the association between  
346 AZY and these hydrophobic residues is thought to occur, the  $SASA_{\text{distal hydrophobic}}$  of the increases to 80-90%  
347 (Fig 3H-J). Furthermore, the ligand is associating primarily with PC2/PN1 and the G-Loop, not with  
348 PC1/PN2 (Table 1). These data suggest that significant hydrophobic interactions between the hydrophobic  
349 residues of the distal site and AZY are unlikely to occur at the Binding stage of our TMD simulations.  
350 However, the hydration of  $SASA_{AZY}$  and  $SASA_{\text{distal}}$  exhibited similar trends between the Transport and  
351 Non-Transport clusters (S5 Fig). Furthermore, instead of the expected domination of hydrophobic  
352 interactions with the putative distal site and PN2, the majority of protein-AZY contacts were contributed  
353 by PN1, which has not previously been suggested to contribute to substrate recognition or extrusion. The  
354 second largest share of contacts was contributed by hydrophobic residues of the G-Loop, which is thought  
355 to filter and orient potential substrates throughout the transport process.

356         While our data support the hypothesis that water plays a role in mediating substrate movement  
357 through the periplasmic cleft [35], the data also suggest that something other than water is causing AZY to  
358 travel farther in the Transport cluster. As mentioned previously, the closing of the periplasmic cleft during  
359 Extrusion or the putative Intermediate states causes AZY to move farther towards the funnel domain. Not  
360 only does this conformational transition restrict access to the entrance of the periplasmic cleft, but it also  
361 significantly restricts the available space within the cleft. This is particularly apparent in the case of the



362 Intermediate (aka “Resting”) structure, in which the periplasmic cleft channel is almost entirely closed,  
363 except for an area quite close to the exit of the cleft [17]. We hypothesize that the transport of AZY by  
364 MtrD is mediated through a combination of 1) protein-ligand interactions, 2) gated access to specific areas  
365 of the periplasmic cleft, 3) a peristaltic-like squeezing caused by the cycle of conformational changes, and  
366 4) hydration of the substrate.

367

### 368 **Streptomycin was not transported by MtrD in TMD simulations.**

369 In TMD simulations with SRY started at Site 1, using the same simulation routines and transport  
370 criteria as for AZY, SRY was classified as ‘not transported’ in 20 out of 20 trajectories (Fig 4). The mean  
371  $\text{RMSD}_{\text{SRY}}$  was  $6.2 \pm 1.7 \text{ \AA}$  (Fig 4A). The starting position of SRY at Site 1 is shown in Fig 4B, and the  
372 ending positions of SRY in all trajectories, as well as representative TMD simulations, are shown in Fig 4C  
373 and S2 Movie. As shown in Fig 4C, SRY remains closely associated with the G-Loop, particularly F612  
374 and S613, throughout the TMD simulations. While hydrogen bonding between SRY and S91 is predicted  
375 to occur in our post-simulation analyses, over 75% of the available SASA of SRY, including the  
376 guanidinium group that contacts S91, was hydrated throughout all of our TMD simulations (Fig 4D).  
377 Furthermore, we found that polar contacts from PN1 and PC2 dominate the protein-SRY interactions  
378 throughout the entire conformational cycle of MtrD, followed by hydrophobic interactions with the G-Loop  
379 (Fig 4C,E and Table 2). SRY did not interact significantly with the PC1 or PN2 domains (Table 2). In these  
380 simulations, we observed that SRY displayed significantly more conformational flexibility than AZY. Our  
381 results indicate that SRY, if placed in the proximal binding site at Site 1, does not exhibit transport behavior  
382 in these simulations.

383

384

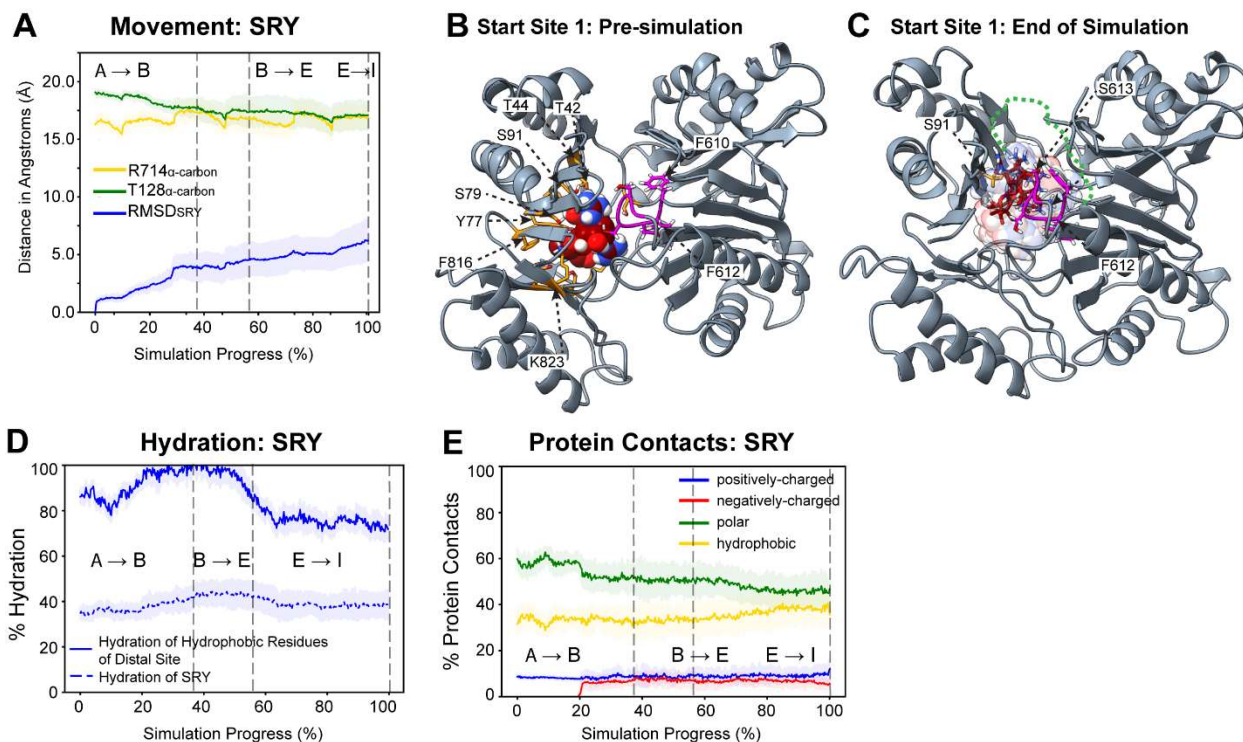

385

386 **Fig 4. Interactions of Streptomycin with the Periplasmic Cleft at Site 1.** Panel A) shows the RMSD of  
 387 SRY from its starting position over time, and the distance between the center of mass of SRY and the  $\alpha$ -  
 388 carbons of T128 or R714 in the periplasmic cleft. B) shows SRY at Site 1 in the Access Pocket at the  
 389 beginning of the TMD Simulations. C) shows all endpoints of SRY superimposed; one ending position of  
 390 SRY, the position closest to fulfilling the criteria for “Transport”, is shown in opaque licorice  
 391 representation; the other “non-transport” ending positions are in semi-transparent spacefill representation.  
 392 A green dashed line marks the ending position of AZY in a transport trajectory as a reference. D) shows  
 393 the percent (%) hydration of the SASA<sub>SRY</sub> over the course of the simulation. E) shows the nature of protein-  
 394 SRY contacts formed throughout the simulation. In B) and C), labeled residues in orange sticks interact  
 395 with SRY in at least 80% of the TMD simulations with the G-Loop in magenta.

396

| SRY          | Percent (%) of Protein-Ligand Contacts Contributed by Domain or Region |           |            |            |           |            |            |            |
|--------------|------------------------------------------------------------------------|-----------|------------|------------|-----------|------------|------------|------------|
| Structure    | G-Loop                                                                 | PC1       | PC2        | PN1        | PN2       | F-Loop     | AP         | DP         |
| Access       | 6.0 ± 0.1                                                              | 0.0 ± 0.0 | 49.1 ± 1.5 | 45.0 ± 1.6 | 0.0 ± 0.0 | 0.0 ± 0.0  | 49.1 ± 1.5 | 45.0 ± 1.2 |
| Binding      | 11.1 ± 3.0                                                             | 0.0 ± 0.0 | 39.8 ± 0.4 | 47.1 ± 1.4 | 0.1 ± 0.0 | 2.0 ± 2.0  | 39.8 ± 0.4 | 47.1 ± 1.4 |
| Extrusion    | 21.3 ± 1.1                                                             | 0.0 ± 0.0 | 31.7 ± 4.8 | 34.1 ± 0.3 | 0.1 ± 0.0 | 13.0 ± 3.5 | 31.7 ± 4.8 | 34.1 ± 0.3 |
| Intermediate | 22.5 ± 8.8                                                             | 0.0 ± 0.0 | 15.8 ± 6.7 | 49.3 ± 4.3 | 1.3 ± 1.3 | 11.2 ± 5.1 | 15.8 ± 6.7 | 50.5 ± 3.0 |

397  
 398 **Table 2. Percentage of Protein-SRY Contacts Contributed by Specific Domains of the MtrD**  
 399 **Periplasmic Cleft.** Contacts are defined as residues whose  $\alpha$ -carbon is within 4 Å of SRY at each timepoint  
 400 of the simulation. Individual domains of the periplasmic cleft are as defined in [13], and the % protein  
 401 contacts for the Access Pocket (PC1 and PC2) and Deep Pocket (PN1 and PN2) have also been calculated  
 402 from the mean contact value. Contact analysis was performed for trajectories in the “Transport” cluster  
 403 using VMD and analyzed with scripts in *Tcl* and python.  
 404

## 405 **Azithromycin exhibits variable behavior at the periplasmic cleft entrance**

406 AZY is a known substrate of MtrD [3, 10, 30, 37]. Due to its large size and the timescale of our  
407 TMD simulations, we did not expect to see AZY diffuse from the periplasmic cleft entrance towards the G-  
408 Loop. Indeed, if the initial process of G-Loop association is a passive diffusional process, as is suggested  
409 by available crystal structures, we would not expect to observe AZY interaction with the G-loop here.  
410 Consistent with these expectations, when AZY was placed at the very entrance of the periplasmic cleft, it  
411 largely remained within the cleft created by PC1/PC2 for the duration of the subsequent TMD simulations.  
412 In 2/20 simulations, AZY<sub>neu</sub> slipped from the periplasmic cleft into the periplasmic space but remained  
413 closely associated with the outer surfaces of the periplasmic cleft. This occurred in 1/20 simulations for  
414 AZY<sub>h1</sub>, and 1/20 for AZY<sub>h2</sub> and is unsurprising given the timescale of the simulations and the fact that the  
415 periplasmic cleft closed without AZY being near the G-Loop or farther back in the pocket. In combination  
416 with our data from Site 1, these simulations suggest that the initial process of substrate capture and  
417 subsequent movement towards the G-Loop, is likely a slow process governed by diffusion. The full results  
418 of our TMD simulations with AZY at Start Site 2, and all resultant positions of AZY, are shown in S6 Fig  
419 and in S3 Movie [5].

420 Although we did not see the diffusion of AZY towards the G-Loop from Site 2 in our TMD  
421 simulations, we unexpectedly observed close interactions between AZY<sub>h1</sub> and the TM9 linker (S3 Movie).  
422 These interactions were also observed with AZY<sub>h2</sub>, but not with AZY<sub>neu</sub>. The uppermost portion of TM9  
423 and its linker (residues 917-927) is thought to be unique to MtrD, projects away from the “body” of the  
424 MtrD homotrimer, and out of the membrane into the periplasm [6, 38]. In addition to substrate capture from  
425 the periplasm, it has been suggested that RND transporters can capture substrates from the inner membrane-  
426 periplasm interface [39]. Both AZY<sub>h1</sub> and AZY<sub>h2</sub> are weakly positively charged, and since gram negative  
427 inner membranes contain negatively-charged POPG lipids, it is possible that these AZY species associate  
428 with the periplasmic leaflet of the inner membrane prior to capture by MtrD [40]. Since TM9 projects out  
429 from the entrance to the periplasmic cleft, a bulky substrate would presumably contact TM9 prior to  
430 entering the periplasmic cleft. We also note that bulky substrates cannot enter directly through the  
431 uppermost regions of the cleft entrance, due to the presence of the membrane fusion protein MtrC (S7 Fig)

432 [41]. Therefore, it is possible that the uppermost region of TM9, which is composed of mostly polar or  
433 charged residues, could assist in capture of charged, amphiphilic substrates of MtrD. The role of this unique  
434 region of TM9 in substrate capture warrants further study.

435

### 436 **Streptomycin is rejected from the periplasmic cleft entrance**

437         Since SRY is not a recognized substrate of MtrD, we acknowledged that the positioning of SRY  
438 within the periplasmic cleft at Site 1 (Figs 2D, 5A) may be unlikely to occur naturally [7]. To test this  
439 assumption, we examined our simulation results from Start Site 2 to see whether SRY could diffuse past  
440 the putative selectivity filter formed by residues at the periplasmic cleft entrance (Fig 2C-D). In contrast to  
441 the behavior of AZY in any simulation performed by us, we observed SRY moving ‘backwards’, i.e. away  
442 from the interior of the periplasmic cleft. In 20/20 subsequent TMD simulations, SRY dissociated from the  
443 interior of the periplasmic cleft and moved further into the solvent (periplasmic side), but remained closely  
444 associated with the solvent-exposed surfaces of the Access Pocket (S6 Fig). In the initial position at Site 2,  
445 SRY was found to be in close contact with two positively charged residues – R714 and K823 – both of  
446 which are thought to be important for macrolide recognition [13]. Since SRY is strongly positively charged,  
447 it is possible that a combination of 1) repulsive interactions with R714 and K823, and 2) unfavorable  
448 contacts with the mostly hydrophobic PC1 domain, contributed to the passive rejection of SRY from the  
449 periplasmic cleft. Once SRY exited the periplasmic cleft, the most frequent residue contact occurred in  
450 14/20 trajectories with D709 (>70% of the simulation time) on the exterior surface of the periplasmic cleft.  
451 The results of TMD simulations of SRY at the cleft entrance are shown in S4 Movie.

452

### 453 **The molecular landscape of the periplasmic cleft changes dynamically**

454         As a member of Hydrophobic-Amphiphile family of RND transporters, MtrD transports a variety  
455 of structurally diverse hydrophobic or amphipathic molecules [9]. To investigate how the dynamic  
456 molecular landscape of the periplasmic cleft might facilitate substrate capture and diffusion, we performed  
457 analyses of the Molecular Lipophilicity Potential (MLP) and the Electrostatic Potential (EP) isosurfaces of  
458 the periplasmic cleft in the presence and absence of AZY.

459

## 460 **Molecular lipophilicity potential (MLP) of the periplasmic cleft**

461 MLP describes the 3D distribution of lipophilicity (i.e., affinity for polar or non-polar solvents) at  
462 a point in space or across a molecular surface, and is calculated by summing the lipophilic contributions of  
463 molecular fragments upon the surrounding environment [42]. A positive (+) MLP value indicates a  
464 *lipophilic* region (Fig 5, gold regions), and a negative (-) MLP indicates a *hydrophilic* region (Fig 5, teal  
465 regions). Since the MLP describes lipophilicity in 3D, the MLP of a molecular surface is sensitive to  
466 changes in the structure of that surface. It is thought that ligand-receptor interactions may involve the  
467 interaction of complementary MLP patches (i.e. hydrophobic-hydrophobic), whereas mosaic MLP  
468 isosurfaces may contribute to weak, dispersive binding forces that might facilitate substrate transport [21,  
469 42]. The first image of Fig 5A, which shows one half of the periplasmic cleft in the Access conformation,  
470 is an example of a mosaic-like MLP surface, where MLP of the available surface area is a patchwork of  
471 MLP-neutral or less-lipophilic surfaces. The second image of Fig 5A, showing the other half of the  
472 periplasmic cleft, shows an example of a large patch of surface area with a strongly lipophilic MLP.

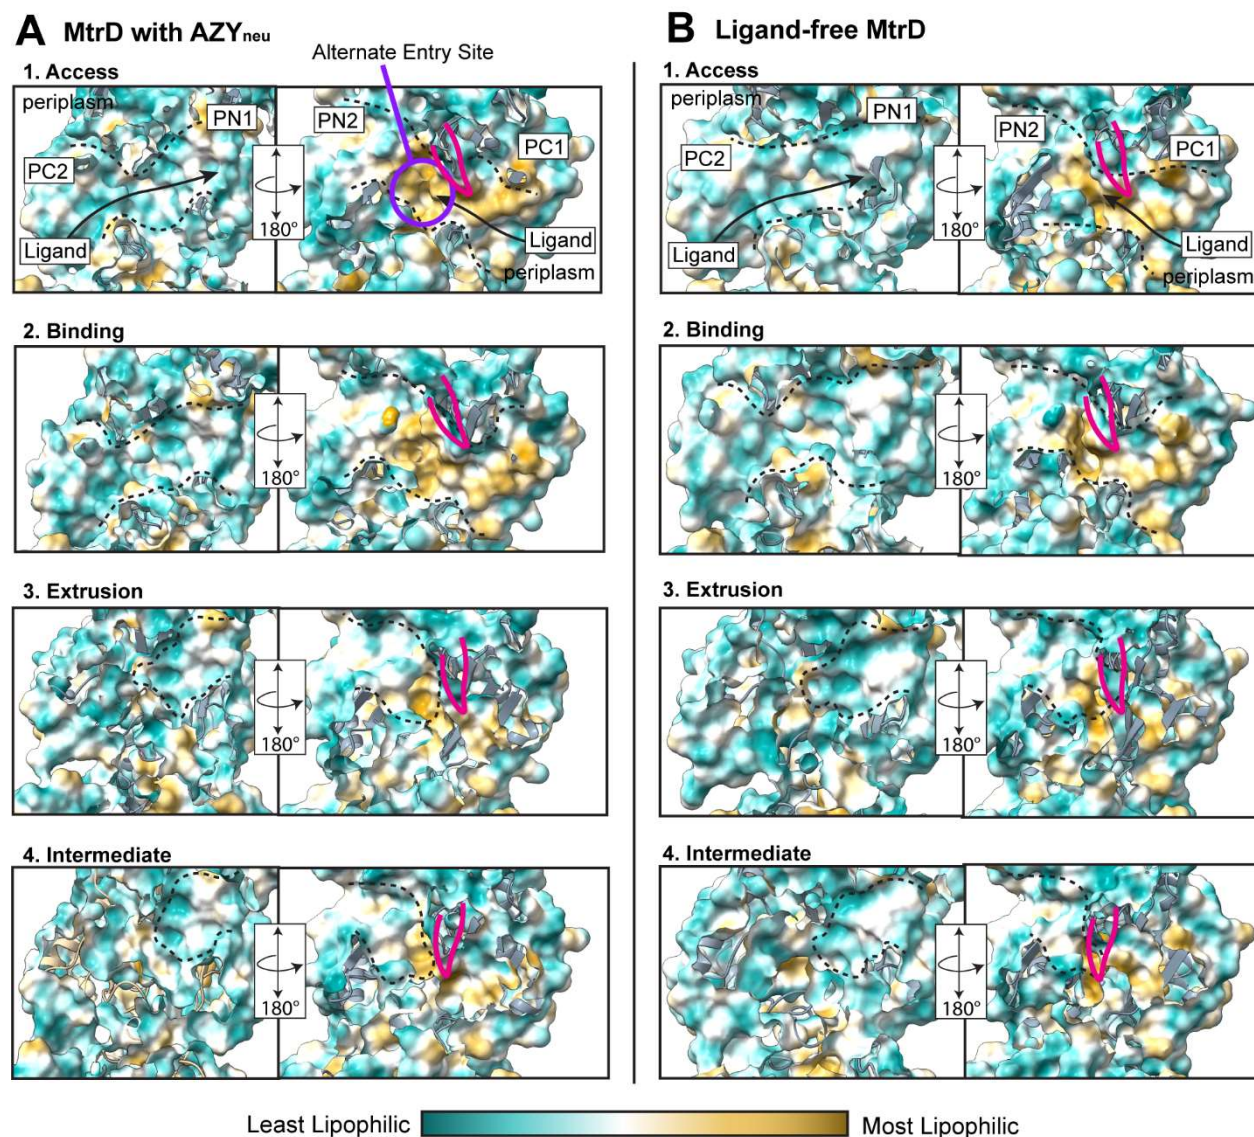

473

474 **Fig 5. The Molecular Lipophilicity Potential Surfaces of the Periplasmic Cleft Change Dynamically**  
475 **during the Conformational Transitions of the Transport Process.** Panels show the Molecular  
476 Lipophilicity Potential (MLP) surfaces plotted on the molecular surface representation of the periplasmic  
477 cleft **A)** in the presence of AZY<sub>neu</sub> and **B)** in the absence of a Ligand. For visual aids, the channels formed  
478 by the periplasmic cleft at each conformation are approximated with dashed lines, the G-Loop is marked in  
479 magenta, and the direction of substrate travel is marked with a black arrow. MLP is colored teal to gold,  
480 from least lipophilic to most lipophilic. MLP was calculated using ChimeraX.

481

482 Through analysis of the AZY-bound or ligand-free monomer, we found that the available MLP  
483 isosurfaces of the periplasmic cleft change dynamically throughout the transport cycle. Fig 5A shows the  
484 MLP surfaces of AZY<sub>neu</sub>-bound MtrD, and Fig 5B shows the surfaces of ligand-free MtrD in the same  
485 conformation. In Access, the MLP of PC2/PN1 was found to be a mosaic of polar-neutral areas, whereas  
486 the MLP of PN2/PC1 was much more lipophilic, particularly at the entrance of the periplasmic cleft and at

487 the alternate entry site for small, hydrophobic substrates (Fig 5A-B, Access). As a member of the  
488 hydrophobic-amphiphile (HAE) family of RND transporters, it is unsurprising that these two areas of the  
489 periplasmic cleft, both of which are thought to contribute to substrate filtration and capture, contain  
490 primarily lipophilic or weakly polar MLP isosurfaces.

491 In the Binding conformation, the division of the available surfaces within the periplasmic cleft is  
492 still apparent, with PC2/PN1 creating a mosaic of hydrophilic and neutral surfaces, and PN2/PC1 creating  
493 a ‘lipophilic highway’ that, at first glance, seems to extend directly through the cleft (Fig 5A-B, Binding).  
494 However, access to this ‘lipophilic highway’ is both obstructed and restricted by the G-Loop, i.e. to  
495 associate with the lipophilic areas of the Deep Pocket, bulky substrates must first contend with the G-Loop  
496 [9]. Our docking studies suggest that the G-Loop sterically hinders AZY from maintaining consistent  
497 contact with the PC1/PN2 domains during the transition from the Access Pocket to the Deep Pocket (S3  
498 Fig). Instead, as shown in S3 Fig, the predicted binding modes of AZY in the periplasmic cleft follow a  
499 pathway that curves to the left side of the G-Loop; along this path, AZY would primarily contact PC2 and  
500 PN1. PC2 and PN1 are a mosaic of hydrophilic and neutral MLP isosurfaces (Fig 5, Binding), and as such,  
501 are particularly suited to facilitating the diffusion of an amphiphilic or hydrophobic substrate

502 In the Extrusion conformation, access to the PC1 and PC2 domains is restricted by A), the closure  
503 of the periplasmic cleft, and B) conformational shifts of the G-Loop. These changes prevent ‘backflow’ of  
504 the substrate into the Access Pocket. In the putative Intermediate conformation, there is even less available  
505 surface area to a ligand in the Deep Pocket, and the Access Pocket is still closed to the periplasm. In both  
506 the Extrusion and Intermediate conformations, the majority of available MLP isosurfaces (to a bound  
507 ligand) were found to be hydrophilic or neutral, apart from the hydrophobic stop-gap formed by the G-Loop  
508 (Fig 5A-B, Extrusion, Intermediate). These isosurfaces may serve to encourage substrates to leave the  
509 periplasmic cleft, as many MtrD substrates are hydrophobic or amphiphilic. Interestingly, analysis of the  
510 AZY-bound monomer reveals that the presence of AZY only slightly changed the MLP signatures of the  
511 periplasmic cleft (Fig 5B).

512 Through MLP analysis of the periplasmic cleft, we found that both substrate entry points contain  
513 significantly *hydrophobic* isosurfaces, and the only known exit consisted of primarily *hydrophilic*-neutral

514 isosurfaces. Therefore, it appeared that substrates first interacted with complementary isosurfaces, and were  
515 subsequently shuttled to uncomplimentary or neutral isosurfaces deeper within the periplasmic cleft. Once  
516 the substrate reaches the Deep Pocket behind the G-Loop, the closure of the periplasmic cleft, and the  
517 shifting of the PC1/PN2 domains, restricts access to hydrophobic areas within the cleft. It appears to us  
518 therefore, that throughout the substrate transport cycle, transport ligand access to hydrophobic areas of the  
519 pump was alternately opened and restricted.

520

### 521 **Electrostatic potential (EP) isosurfaces of the periplasmic cleft**

522 As with MLP, the electrostatic potential (EP) isosurfaces of the periplasmic cleft change  
523 dynamically throughout the transport process. However, in contrast to the results of the MLP analyses, we  
524 observed that the EP isosurfaces changed significantly in the presence AZY. Fig 6A shows the EP of  
525 AZY<sub>neu</sub>-bound MtrD, and panel B shows the EP of ligand-free MtrD. In the absence of AZY, the  
526 periplasmic cleft contained mildly negative or neutral isosurfaces (Fig 6B). In the presence of AZY, the  
527 cleft gained positive-neutral mosaic isosurfaces in the Access conformation and lost a significantly negative  
528 patch in the Binding conformation (Fig 6A). Furthermore, in the Extrusion and Intermediate conformations,  
529 a strongly positive region near the G-Loop was contributed by K823 (Fig 6A, Extrusion). Since forces were  
530 only applied to the  $\alpha$ -carbons of the protein backbone in these simulations, the side chains and ligand were  
531 allowed to move freely. Therefore, changes in the EP isosurfaces are due presumably to (1) changes in the  
532 orientation of side chains and (2) the presence of AZY. Since AZY<sub>h1</sub> and AZY<sub>h2</sub> are weakly positively  
533 charged, it is possible that the strongly positive patch near the G-Loop serves to repel AZY away from the  
534 center of the cleft and up into the funnel domain of the transporter.

535



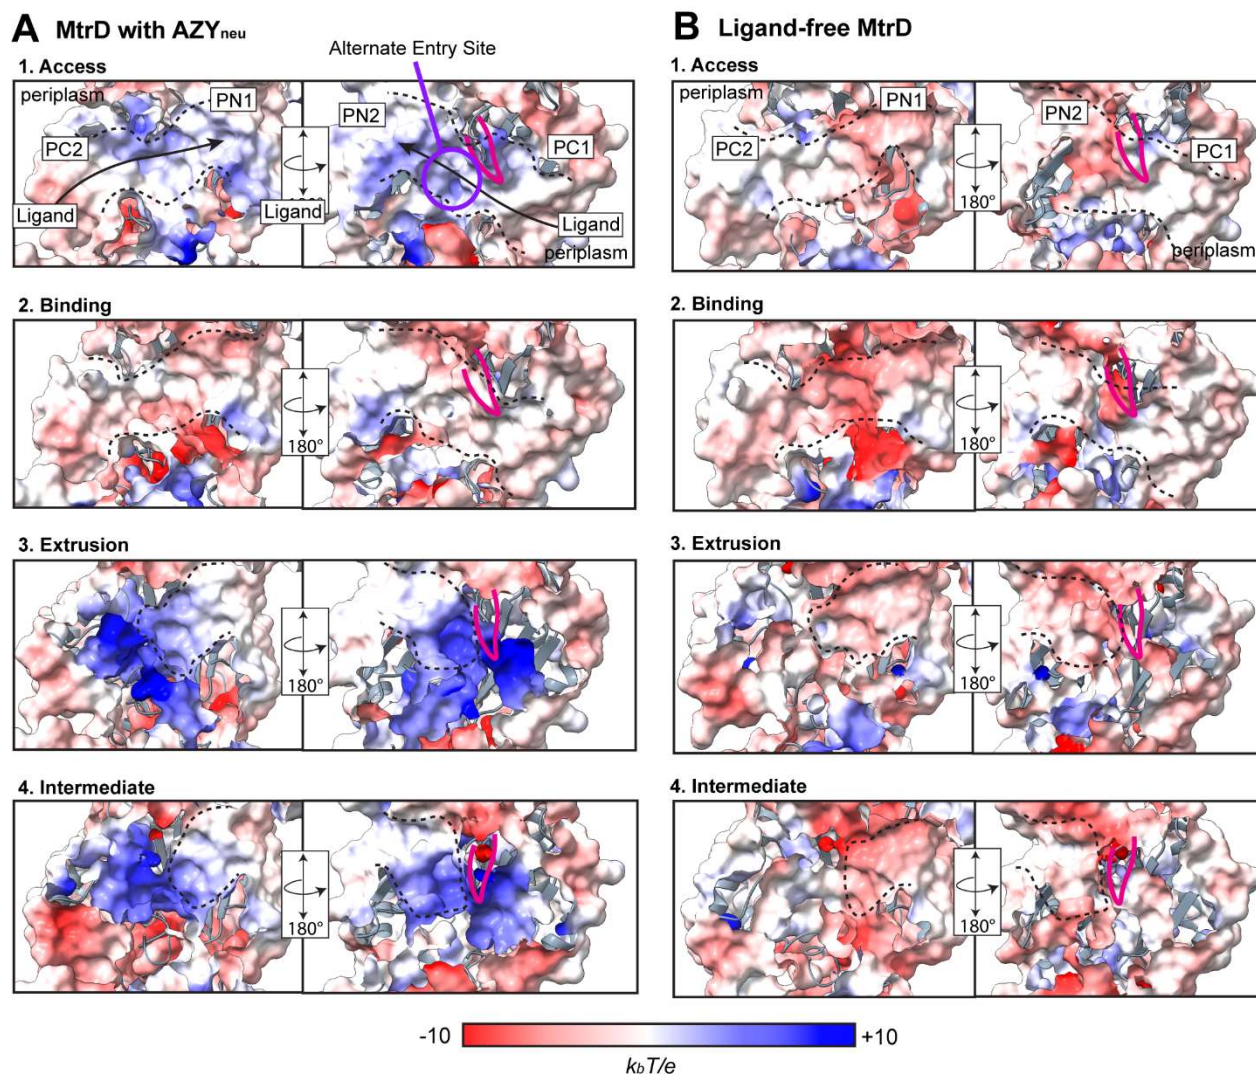

536

537 **Fig 6. The Electrostatic Potential Surfaces of the Periplasmic Cleft Change Dynamically in the**  
 538 **Presence of AZY.** Panels show the Electrostatic Potential surfaces plotted on the molecular surface  
 539 representation of the periplasmic cleft **A)** in the presence of AZY<sub>neu</sub> and **B)** in the absence of a Ligand. For  
 540 visual aids, the channels formed by the periplasmic cleft at each conformation are approximated with  
 541 dashed lines, the G-Loop is marked in magenta, and the direction of substrate travel is marked with a black  
 542 arrow. EP is colored red to blue, from negative (  $-10 k_b T/e$ ) to positive (  $+10 k_b T/e$ ) potential, where  $k_b$  is  
 543 the Boltzmann constant, T is the absolute temperature (310K), and e is the electron charge. EP surfaces  
 544 were calculated using the APBS online server and visualized with ChimeraX.

545

## 546 **A potential role for MtrC in substrate recognition**

547 Regarding the interpretation of our MD results, a significant consideration is the lack of the  
 548 membrane fusion protein (or ‘periplasmic adaptor’) MtrC in our simulations. The complete MtrCDE  
 549 complex assembles with a 3:6:3 stoichiometry; MtrC assembles as a hexamer, whilst MtrD and MtrE both  
 550 assemble as trimers [43]. Since the structure of MtrC remains unsolved, we built a homology model using

551 AcrA from the AcrAB-TolC complex; AcrA shares a 44.6% sequence identity with MtrC (PDB ID 5NG5)  
552 [41]. A full model of MtrCDE was subsequently built using the structures of MtrD (4MT1), MtrE (4MTO),  
553 and the model of MtrC [6, 44]. To assemble MtrCDE, the fully-assembled AcrAB-TolC (5NG5) was used  
554 as a structural template, since this homologous system also assembles with a 3:6:3 stoichiometry [41]. The  
555 resultant MtrCDE model is shown in S7 Fig. We found that two MtrC monomers significantly contact the  
556 periplasmic cleft of each MtrD monomer. As shown in S7A Fig, one monomer sits atop the entrance of the  
557 periplasmic cleft of MtrD (1546.5 Å<sup>2</sup> total contact area), and one contacts the outer surfaces of the PN1  
558 domain (909.3 Å<sup>2</sup> total contact area). The positioning of MtrC would prevent substrates from diffusing  
559 directly through the top of the entrance to the periplasmic cleft. However, due to its extensive contacts with  
560 the entrance of the periplasmic cleft, it is possible that MtrC plays a role in screening of substrates,  
561 particularly those of large molecular weight.

562 To investigate the potential role of MtrC in substrate recognition, our fully assembled MtrC model  
563 was subjected to analyses of the Molecular Lipophilicity Potential (MLP) and the Electrostatic Potential  
564 (EP) isosurfaces as previously described. We found that the regions of MtrC that contact the periplasmic  
565 cleft, and particularly those that might contact bulky substrates, are a mosaic of weakly hydrophilic or  
566 neutral surfaces (S7B-C Fig). However, our docking studies exclusively identified docking poses within  
567 the lower regions of the periplasmic cleft (S3 Fig) well separated from the MtrC contact regions, raising  
568 the question of whether a substrate might contact these regions of MtrC at all. Additionally, docking studies  
569 performed by Chitsaz et al. predicted binding poses for AZY almost exclusively within the Deep Pocket  
570 (i.e. behind the G-Loop) of the unequilibrated MtrD crystal structure (4MT1) [9]. Even though both docking  
571 studies of AZY against MtrD fully sampled the Access Pocket, neither we nor Chitsaz et al. identified  
572 predicted binding poses of AZY in the regions of the cleft entrance that contact MtrC. Therefore, based  
573 upon the MtrCDE model and the best available evidence, we conclude that MtrC is unlikely to play a  
574 significant role in the identification and filtering of substrates.

575

## 576 **AZY diffuses through the periplasmic cleft in a long timescale simulation.**

577           Crystal structures of AcrB suggest that large substrates first associate with the G-Loop after  
578 entering the periplasmic cleft, and subsequently enter the Deep Pocket during the Access to Binding  
579 transition. MD studies of AcrB also suggest that the energy-requiring step in the conformational sequence  
580 is the structural change between the Binding and Extrusion conformations [14-16, 35]. In light of these  
581 data, we postulate that our AZY-bound MtrD system approximates a model of MtrD in the Access  
582 conformation with a substrate bound at the proximal site, and closely associated with the G-Loop.

583           The structural transitions of the MtrD efflux cycle are slow and presumably powered by changes  
584 in the protonation state of the proton relay network (PRN) [17]. To overcome these limitations, we used  
585 TMD to model the conformational changes of a putative transport cycle without altering the protonation  
586 state of the transmembrane PRN. However, the applications of TMD can be limited due to the use of biasing  
587 forces and the lack of control over simulation timescales, depending upon the TMD implementation used.  
588 To address these limitations, we performed an unbiased simulation of AZY<sub>neu</sub> at Start Site 1 using the  
589 AMBER pmemd-cuda MD engine. This 1.5 $\mu$ s simulation was performed at 310K (Fig 7A), and no external  
590 forces were applied to any atom in this system; in addition, the protonation states of the PRN were unaltered.  
591 Previous work suggests that the transition from Binding to Extrusion is the energy-requiring step in the  
592 transport cycle [14]. Therefore, in an unbiased simulation of AZY at Start Site 1, we do not expect the  
593 monomer to adopt the Extrusion (or Intermediate) conformation and extrude AZY.

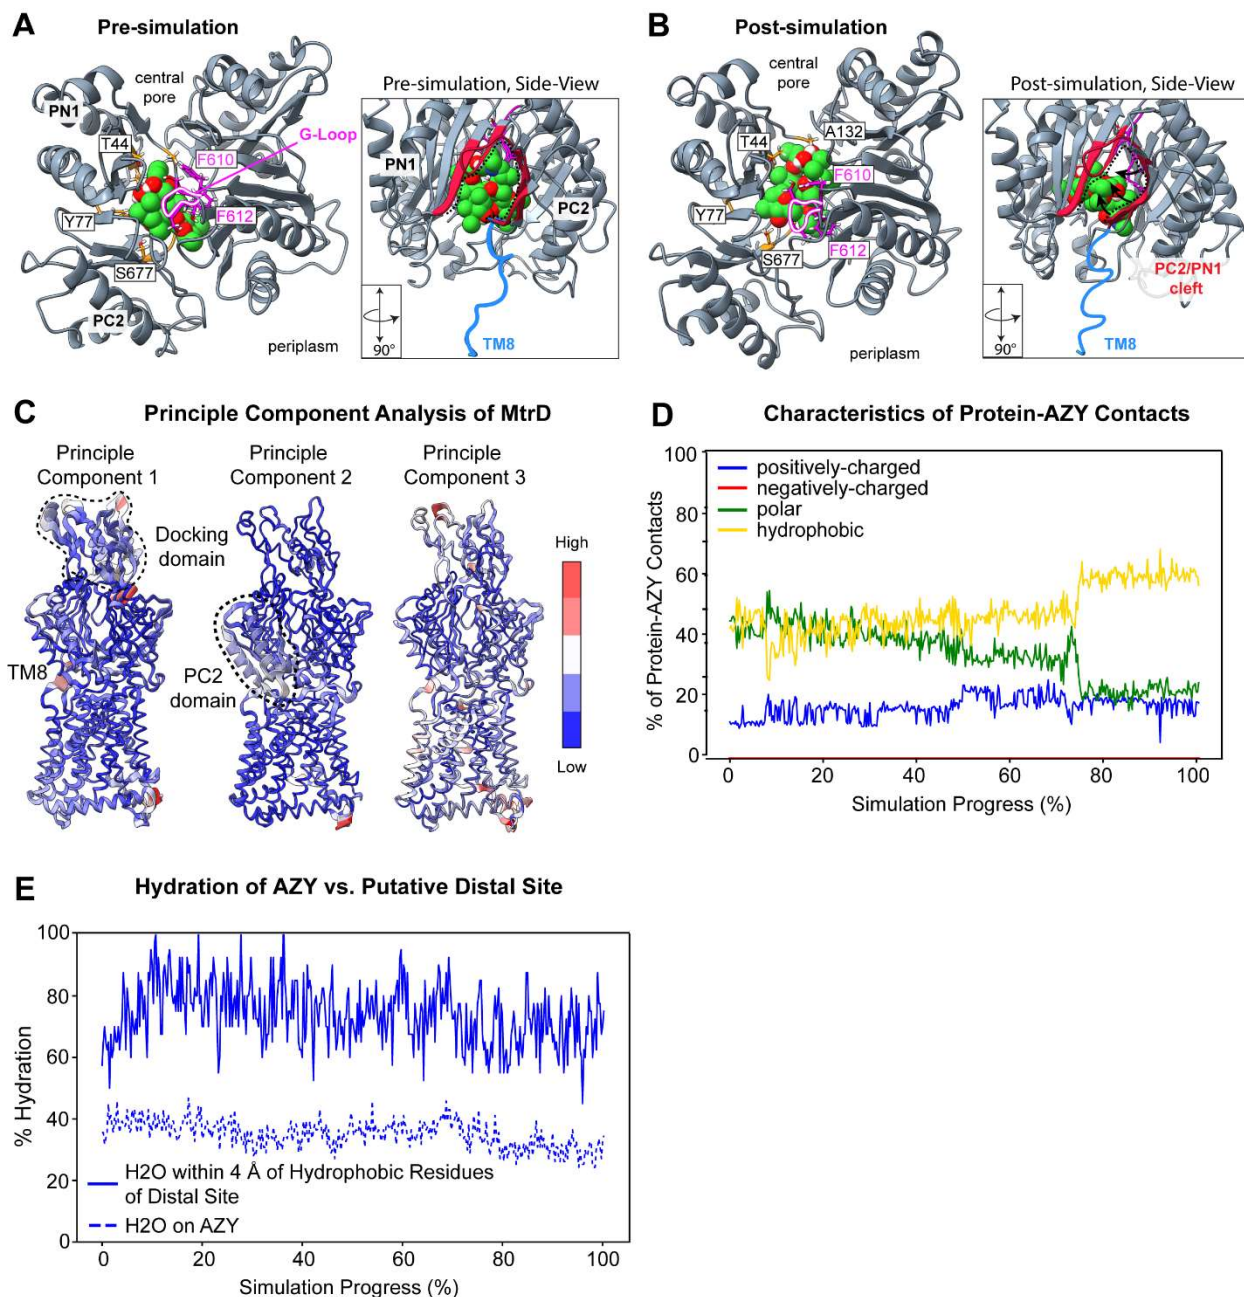

594

595 **Fig 7. Conformational Dynamics of Azithromycin and MtrD during a Long Timescale MD**  
 596 **Simulation.** (A-B) Pre- and post-simulation snapshots of AZY<sub>neu</sub> and the periplasmic cleft, viewed from the  
 597 top down, or viewed from the side (boxed view), showing AZY (green), the G-Loop (magenta), TM  
 598 helix 8 (blue), and the PC2/PN1 cleft (outlined in red). Labeled residues interact with AZY for ~80% of the  
 599 simulation. In (B), arrows show how the PC2/PN1 cleft shifts. (C) Results of Principle Component Analysis  
 600 on the MtrD backbone. Principle components 1, 2 and 3 mapped onto the MtrD monomer. Red indicates  
 601 areas of high structural fluctuation; blue indicates very low structural fluctuation. (D) The percentage of  
 602 contacts between AZY and the periplasmic cleft that are charged, polar, or hydrophobic. (E) The hydration  
 603 of the SASA of AZY or residues of the putative distal site throughout the simulation.

604

605 In this long timescale, unbiased simulation, we observed the movement of AZY past the G-Loop  
 606 and into the Deep Pocket of MtrD (Fig 7B, Table 3). Principle Component Analysis of the protein backbone

607 reveals that significant fluctuations occurred in the PC2 domain, TM helix 8, and the docking domain of  
 608 MtrD (Fig 7C). Since MtrCE is absent from our simulations, fluctuations of the docking domain – which  
 609 normally interfaces with the sizeable MtrCE complex – are unsurprising (S7 Fig). However, structures of  
 610 AcrB and the variant MtrD<sub>CR103</sub> (PDB IDs 5NC5, 6VKT) suggest that conformational changes in TM8 and  
 611 the PC2 domain do occur, at some point, during the transition from Access to Binding [13, 41]. Specifically,  
 612 1) the upper portion of TM8 will adopts a more ordered structure, eventually settling into a full alpha helix  
 613 in the Extrusion conformation; and 2) the PC2 domain opens even wider than in the Access conformation.  
 614 Interestingly, we observed corresponding conformational shifts in both TM8 and PC2 in our simulation  
 615 (Fig 7B,C) [13, 41]. Specifically, TM8 transitioned from a disordered loop, to a more ordered structure  
 616 (Figure 7A,B in blue), and PC2 opened wider once AZY slipped into the DP (S5 Movie).  
 617

|                    |                       | Percent (%) of Protein-Ligand Contacts Contributed by Domain or Region |      |      |      |      |        |                  |                  |
|--------------------|-----------------------|------------------------------------------------------------------------|------|------|------|------|--------|------------------|------------------|
|                    | Simulation Checkpoint | G-Loop                                                                 | PC1  | PC2  | PN1  | PN2  | F-Loop | AP (PC1 and PC2) | DP (PN1 and PN2) |
| AZY <sub>neu</sub> | 0%                    | 12.3                                                                   | 12.3 | 34.4 | 36.2 | 1.2  | 3.7    | 50.3             | 37.4             |
|                    | 20%                   | 16.0                                                                   | 4.6  | 35.1 | 44.3 | 0.0  | 0.0    | 39.7             | 44.3             |
|                    | 40%                   | 18.1                                                                   | 4.3  | 35.1 | 37.8 | 4.8  | 0.0    | 39.4             | 42.6             |
|                    | 60%                   | 15.3                                                                   | 6.7  | 33.7 | 36.8 | 7.4  | 0.0    | 40.5             | 44.2             |
|                    | 80%                   | 13.6                                                                   | 17.9 | 14.2 | 40.1 | 11.7 | 2.5    | 34.6             | 51.9             |
|                    | 100%                  | 11.2                                                                   | 16.5 | 14.1 | 43.5 | 11.8 | 2.9    | 33.5             | 55.3             |

618  
 619 **Table 3. Percentage of Protein-AZY Contacts Contributed by Specific Domains of the MtrD**  
 620 **Periplasmic Cleft in a Long Timescale Simulation.** Contacts are defined as residues whose  $\alpha$ -carbon is  
 621 within 4 Å of AZY at each specified timepoint of the 1.5 $\mu$ s simulation with AMBER. Individual domains  
 622 of the periplasmic cleft are as defined in [13], and the % protein contacts for the Access Pocket (PC1 and  
 623 PC2) and Deep Pocket (PN1 and PN2) are calculated from the mean contact value. Contact analysis was  
 624 performed with scripts in *Tcl* and python.  
 625

626 Furthermore, while many of the MtrD-AZY contacts were either hydrophobic or polar at the  
 627 beginning of the simulation, the majority of contacts were hydrophobic at the end of the simulation (Fig  
 628 7D). The hydration of the SASA<sub>AZY</sub> decreases slightly overall; however, the SASA<sub>distal</sub> is  $\geq 70\%$  hydrated  
 629 for the majority of the simulation, indicating that significant hydrophobic interactions between the putative  
 630 distal site and AZY were then unlikely to occur in our simulation (Fig 7E). The movement of AZY through  
 631 the periplasmic cleft, along with the accompanying conformational shifts of MtrD, are shown in Movie S5.  
 632 Our results are in line with MD studies of the MtrD homologue AcrB, which suggest that the transition

633 from Binding to Extrusion is the energy dependent phase [35]. Our results are also supported by the MD  
634 study of MtrD performed by Chitsaz et al, in which progesterone was observed to spontaneously move into  
635 Access Pocket, past the G-Loop, and into the Deep Pocket – all in the absence of biasing forces, and without  
636 changes to the Proton Relay Network of MtrD [9]. Interestingly, this study observed the movement of  
637 progesterone through the periplasmic cleft in ~40 ns; we postulate that the increased movement speed  
638 (relative to our simulation of AZY) could be due to the significant discrepancy in size between progesterone  
639 and AZY (~315 Da for progesterone vs. ~749 Da for AZY).

640

## 641 **Discussion**

642 In this study, we have simulated the transport of AZY by MtrD in biased Targeted Molecular  
643 Dynamics simulations, and in an unbiased, long-timescale NPT MD simulation. We also observed the  
644 passive rejection of SRY from the entrance of the periplasmic cleft, or alternatively the retention of SRY  
645 within the cleft during the putative transport cycle. We showed that the access to various isosurfaces of the  
646 periplasmic cleft changes dynamically, and that access is controlled in a way that might facilitate substrate  
647 discrimination, transport and extrusion. In contrast to the interpretation of results from crystal structures of  
648 the MtrD homologue AcrB and cryo-EM structures of MtrD<sub>CR103</sub>, AZY was not observed to interact with  
649 residues of the putative distal binding site in the Deep Pocket in TMD simulations, but took an alternative  
650 transport pathway mediated by water, and by interactions with PN1 and the G-Loop [13, 16]. In our long  
651 timescale, unbiased MD simulation, we observed AZY diffuse into the Deep Pocket past the G-Loop, and  
652 we observed the AZY-bound monomer begin to undergo conformational changes that are associated with  
653 the transition from Access to Binding.

654

### 655 **AZY TMD trajectories diverge during the transition from access to binding**

656 With our TMD simulations, we were able to increase the sample size significantly to 20 simulations  
657 per ligand at each starting site. This larger sample size allowed us to observe variable behavior of AZY  
658 during the simulations. Through analysis of the specific domains contacted by AZY throughout the  
659 simulation, we found that the “Transport” trajectories diverged from the “Non-Transport” trajectories

660 during the transition from Access to Binding ([Table 1](#)). Specifically, if AZY slipped past the G-Loop at  
661 some point during the transition from Access to Binding, then AZY was positioned fully behind the G-  
662 Loop, and subsequently squeezed towards the exit as the cleft entrance closes (during the transition from  
663 Binding to Extrusion). Notably, this movement of AZY into the Deep Pocket occurred during the  
664 conformational transition period, and thus *before* the periplasmic cleft had fully adopted the Binding  
665 conformation. These data indicate that AZY can pass the G-Loop even if the cleft is not in its most open  
666 conformation. This correlates with the results of our long timescale simulation, in which AZY  
667 spontaneously slipped past the G-Loop and into the Deep Pocket, even though the transporter was not yet  
668 in the Binding conformation. This is also supported by the results of our docking experiments against apo-  
669 MtrD, which identified predicted binding positions of AZY that spanned the length of the periplasmic cleft  
670 (S3 Fig).

671

## 672 **Molecular characteristics of the periplasmic cleft facilitate recognition and** 673 **diffusion of substrates**

674 Our MLP analyses revealed that the available MLP isosurfaces of the periplasmic cleft changes  
675 dynamically throughout the transport cycle. Areas that are responsible for substrate filtration and capture  
676 contain significantly hydrophobic isosurfaces, and in the case of the alternate entryway site for small  
677 substrates, the passage is lined with bulky hydrophobic residues (Fig 5). These lipophilic isosurfaces may  
678 facilitate the substrate selectivity of MtrD, which is a member of the hydrophobic-amphiphile family of  
679 RND transporters, thereby allowing ligands with sufficient complementarity to enter the cleft and associate  
680 with the G-Loop. As shown with our simulations of SRY, bulky molecules with non-complementary  
681 characteristics are unable to pass reliably through this selectivity filter at the cleft entrance.

682 The MLP isosurfaces of the periplasmic cleft interior are mosaic-like; consequently, they are well-  
683 suited to allowing MtrD substrates to diffuse through the tunnel formed by the periplasmic cleft, as shown  
684 by Chitsaz et al. in their simulations of MtrD and its substrate progesterone [9]. Along with the presence of  
685 water [35], these mosaic-like surfaces of the interior may prevent substrates from stabilizing inside the cleft  
686 as subsequent conformational motions squeeze them towards the funnel domain. Once substrates reach the

687 Deep Pocket behind the G-Loop, access to lipophilic areas in the Access Pocket is restricted by closure of  
688 the PC1/PC2 domains. With the exception of the lipophilic stop-gap formed by the G-Loop, the ligand-  
689 accessible isosurfaces are either hydrophilic-neutral or positive neutral (Figures 5 and 6, Panel A,  
690 ‘Extrusion’). The positive patch may repel charged substrates from the center of the cleft, thereby  
691 positioning substrates for release into the funnel domain.

692 Thus, the interior of the cleft contains 1) substrate-complementary surfaces to aid discrimination at  
693 the entrance, 2) mosaic-neutral surfaces to aid diffusion towards the funnel domain, and 3) mosaic-repulsive  
694 surfaces to aid diffusion and eventual extrusion of substrates. The correlated motions of the periplasmic  
695 cleft and of the G-Loop serve to alternately restrict and allow access to areas with specific MLP and EP  
696 signatures. While the MLP signatures of the cleft do not appear to change significantly in the presence of  
697 AZY, the presence of AZY does appear to affect the EP isosurfaces of the cleft.

698

### 699 **AZY did not exit fully into the funnel domain**

700 We did not observe the exit of AZY into the funnel domain (Fig 1A-B) in any of our MD  
701 simulations. To our knowledge, no computational simulation of an RND transporter has modeled substrate  
702 release into the funnel/docking domain without the use of biasing forces upon the ligand or substrate itself  
703 [9, 45], which is consistent with the hypothesis that substrate release occurs on a longer timescale than is  
704 currently reasonable to simulate on most systems.

705

### 706 **AZY did not interact with the ‘hydrophobic trap’ of the distal site in our** 707 **simulations**

708 Cryo-EM structures of MtrD<sub>CR103</sub> show the macrolide erythromycin bound in the “hydrophobic  
709 trap” of the PC1/PN2 cleft (PDB 6VKT) [13, 16]. The ‘hydrophobic trap’ is a set of hydrophobic residues  
710 that forms the alternate entry site for small, hydrophobic substrates in the Deep Pocket (Fig 2C, green  
711 residues) [46]. Studies suggest that residues of the hydrophobic trap are quite important for the proper  
712 function of RND transporters [46, 47]; specifically regarding MtrD, mutations in this region (F136A,



713 F176A, and F623C) correlate with a decrease in the MIC (Minimum Inhibitory Concentration) of the  
714 antibiotics rifampin (~823 Da), novobiocin (~613 Da), and oxacillin (~401 Da) [9]. Since none of these  
715 antibiotics are macrolides, the result of mutations in this region upon the MIC of macrolides warrants further  
716 study. Consequently, we expected that AZY would interact with the hydrophobic residues of the distal site  
717 when the transporter was in the Binding conformation.

718 Surprisingly, in our TMD simulations, we found that AZY took an alternate path through the Deep  
719 Pocket primarily involving PN1 and the G-Loop, and not PN2 and the hydrophobic trap as expected. In our  
720 long timescale simulation, we observed interactions between AZY and the hydrophobic trap only at the end  
721 of the simulation, and these contacts were relegated to the periphery of the AZY molecule. At no point, in  
722 any of our simulations, was AZY bound in a conformation similar to that of erythromycin in the Deep  
723 Pocket of MtrD<sub>CR103</sub>. Nevertheless, the role of the distal site (and the hydrophobic trap therein) in macrolide  
724 transport is of interest. One particularly important question that remains is whether the conformational  
725 change from Binding to Extrusion is enough to extrude a large substrate out of the hydrophobic trap and  
726 into the funnel domain?

727 To investigate this question, we modeled the structural transition from Binding to Extrusion using  
728 the erythromycin-bound monomer of MtrD<sub>CR103</sub> (PDB ID 6VKT, Movie S6). We found that the putative  
729 distal site constricts significantly during this conformational change. We note that this constriction may be  
730 sufficient to squeeze a bulky substrate up into position for release into the funnel domain, but it is unclear  
731 whether it provides enough force to extrude the substrate. Therefore, it remains unclear whether the  
732 substrate exits into the funnel domain as the monomer transitions from Binding to Extrusion, or if the  
733 monomer adopts Extrusion and then waits for the substrate to disassociate. Our data suggest that substrate  
734 release into the funnel domain occurs slowly and *after* the monomer has reached Extrusion. Furthermore,  
735 our data indicate that the extrusion of bulky substrates may be aided by further constriction of the  
736 periplasmic cleft in the putative Intermediate (aka “Resting”) state.

737

## 738 **Molecular characteristics of the periplasmic cleft facilitate rejection of SRY**

739 Our results demonstrate that SRY is unlikely to successfully enter the periplasmic cleft of MtrD,  
740 and thus will not be transported by MtrD. Since SRY is too large to pass through the alternate entry site  
741 behind the G-Loop, the only available point of entry is through the Access Pocket (AP) at the foremost  
742 region of the periplasmic cleft. Our simulations of SRY at the periplasmic cleft entrance (Fig 2B, Site 2)  
743 support the conclusion that SRY is unlikely to successfully enter through the Access Pocket of MtrD.  
744 Nevertheless, while SRY was observed to diffuse out of the cleft and into the solvent, it did remain  
745 associated with the periplasmic-exposed surfaces of the AP (S6B Fig, S4 Movie). The outer surfaces of the  
746 AP possess negative patches, particularly near D709, that may attract SRY to these regions once it exits the  
747 cleft. Taken together, our results also indicate that SRY is an unlikely candidate for an MtrD inhibitor, since  
748 it is unable to enter the transporter successfully.

749

## 750 **Mutations alter the molecular landscape of the periplasmic cleft**

751 Mutational studies have shown that a K823E mutation in the periplasmic cleft results in a fourfold  
752 increase in AZY resistance; consequently, K823 is thought to be important for macrolide recognition [9,  
753 13]. We performed EP and MLP analysis of the MtrD periplasmic cleft with the K823E mutation and found  
754 that the cleft gains a strongly negative patch in the proximal binding site near the G-Loop and TM8. Since  
755 >90% of AZY are weakly positively charged at physiological pH, it is possible that this pocket would serve  
756 to further attract AZY into the periplasmic cleft after the initial association with the entrance of the cleft.  
757 Indeed, we observed close interactions between AZY and K823 throughout the majority of the long  
758 timescale simulation. Consequently, K823-macrolide interactions warrant further study.

759 Analysis of the K823E mutation raises an additional question: could MtrD<sub>K823E</sub> transport SRY?  
760 When examining the MLP of the periplasmic cleft entrance, we found that PC1, which forms half of the  
761 entrance to the cleft, contains significant hydrophobic isosurfaces (Fig 5A-B). Positioned opposite to the  
762 hydrophobic surfaces of PC1 is the conserved, positively charged residue R714. Thus for SRY to  
763 successfully enter the periplasmic cleft, it would need to pass the positively-charged residue R714, as well  
764 as the significantly hydrophobic isosurfaces of PC1, before reaching the K823E. As shown in S1 Table, the

765 topological polar surface area (TPSA) of SRY is nearly two times greater than the TPSA of AZY<sub>h2</sub>. In this  
766 case, as TPSA increases, hydrophilicity increases, and vice versa. Analysis of the Log *S* (solubility in water)  
767 and the Log *P*<sub>oct/wat</sub> (octanol-water partitioning) reveals that SRY is significantly more hydrophilic than any  
768 of the three protonation states of AZY (S1 Table). Therefore, SRY is unlikely to interact favorably with the  
769 hydrophobic surfaces of PC1, or with R714 of PC2. Since AZY is significantly more lipophilic than SRY,  
770 AZY is more likely to interact favorably with these surfaces, and to successfully enter the periplasmic cleft.  
771 To our knowledge, the potential of MtrD<sub>K823E</sub> to transport SRY has not been assessed.

772

### 773 **The potential effects of different forcefields on simulations of AZY and MtrD**

774 In this study, we demonstrated the transport of AZY, a known substrate of MtrD, in simulations  
775 with two types of force fields using two different MD engines – NAMD with CHARMM36 force fields,  
776 and AMBER pmemd-cuda with Amber force fields. This suggests that our results are not artifacts of the  
777 force fields employed.

778

### 779 **MtrD transports substrates through a combination of controlled diffusion and** 780 **peristalsis**

781 On the basis of this work, we suggest the following transport mechanism for macrolides by MtrD.  
782 (1) A transported macrolide first associates with, and then passes, the selectivity filter at the entrance of the  
783 periplasmic cleft. This filter is formed by conserved residues and by isosurfaces that are complementary to  
784 the substrate profile of the transporter. (2) The macrolide diffuses slowly through the periplasmic cleft,  
785 contacting residues of the loosely defined proximal site, and eventually associating with the G-Loop (Fig  
786 2A) [13]. (3) The macrolide slips past the G-Loop and into the Deep Pocket, still associating with residues  
787 of the proximal site. Once the macrolide enters the Deep Pocket, the MtrD monomer undergoes the  
788 transition from Access to Binding, opening the periplasmic cleft even wider. (4) Once in the Deep Pocket,  
789 the macrolide may interact with the putative distal site, or with the PN1 domain. In both cases, it is still  
790 contacting the G-Loop. If the macrolide takes the ‘PN1 route’, it is technically still associating with residues

791 of the proximal binding site (Fig 2A). (5) Changes in the transmembrane Proton Relay Network then power  
792 the transition from Binding to Extrusion, in part through resultant vertical shearing motions in the  
793 transmembrane helices [15]. This restricts access to the periplasm and the Access Pocket, resulting in the  
794 extrusion of the substrate towards the funnel domain. (6) Once the monomer reaches the Extrusion  
795 conformation and the substrate is positioned for disassociation into the funnel domain, the monomer waits  
796 for the relatively slow process of substrate release. (7) During this waiting period, the monomer could relax  
797 and pass through the putative Intermediate conformation, which may serve to further move bulky substrates  
798 out of the transport channel. It is unclear whether MtrD requires multiple cycles to transport a ligand as  
799 large as AZY. It is also unclear if the presence of multiple transport ligands within the same periplasmic  
800 cleft, or in other monomers of the transporter, would aid the dissociation of AZY into the funnel domain.

801

## 802 **Multiple transport pathways through the periplasmic cleft**

803 In conclusion, our data suggest that substrate transport through the periplasmic cleft of MtrD  
804 depends upon a combination of diffusion, gated access to areas with variable charge and lipophilicity  
805 isosurfaces, and conformational changes of the surrounding structure. We may have identified a low energy,  
806 peristalsis-complementary diffusion path for AZY through the periplasmic cleft that does not involve  
807 interactions with the hydrophobic trap of the putative distal site [16]. Our results suggest that multiple  
808 pathways, or residue contact pathways, may exist within the periplasmic cleft for substrates of MtrD.

809

810

## 811 **Acknowledgements**

812 The authors would like to acknowledge and thank James W. McCormick for his valuable and constructive  
813 suggestions and guidance during the planning and development of this work. We would also like to thank  
814 Amit Kumar and Robert Kalescky for their continual support, guidance, and patience with our use of the  
815 *Maneframe II* computer. We would like to thank Dr. Edward Yu for piquing our interest in these fascinating  
816 transporters.

817

818 The authors declare no competing financial interest.

819

820

## 821 **Materials and Methods**

822

### 823 **Software**

824 Missing residues in the 4MT1 structure of MtrD were repaired with Modeller v. 9.24 (residues 1,  
825 494-507, 671-672, 1041-1056) [6, 29]. The complete MtrD homotrimer was built in VMD (Visual  
826 Molecular Dynamics, v 1.9.4) using the crystallographic coordinates in the 4MT1 PDB file [48]. A  
827 heterogeneous bilayer consisting of POPE, POPG, and cardiolipin was created using the CHARMMGUI  
828 Membrane Builder with CHARMM36 topology [24, 49, 50]. The homotrimer was minimized to relax the  
829 modeled loops, and then embedded into the membrane using coordinates from the Orientation of Proteins  
830 in Membranes (OPM) Michigan database [38]. Lipids were retained in the central pore of the protein. The  
831 protein-membrane system was solvated with TIP3 water and ionized to a concentration of 0.15M NaCl  
832 using the Solvate and Autoionize plugins of VMD. All Molecular Dynamics (MD) simulations were  
833 performed with NAMD 2.12 using CHARMM36 force fields and topology unless otherwise stated. The 1.5  
834  $\mu$ s simulation of MtrD and AZY was performed with AMBER18 using the ff14SB, Lipid17, GAFF2 and  
835 TIP3p force fields employing the pmemd.cuda-DPPF molecular dynamics engine [22, 23, 27]. The  
836 CHARMM-GUI Ligand Reader and Modeller was used to format and parameterize ligands for simulations  
837 [24, 49]. PROPKA3.1 and the Henderson-Hasselbalch Equation was used to estimate ligand protonation  
838 states at a pH of 7.4. *Autodock Vina 1.1.2* was used to dock AZY or SRY ligands to the drug binding domain  
839 of MtrD. Autodock Tools was used to define dock boxes [28, 51]. Bio3D was used for analysis and  
840 generation of target structures for Targeted MD simulations [52]. Protein images were generated using  
841 UCSF ChimeraX [53]. Data analysis was performed using in-house scripts written in *Tcl*, R, and python.  
842 Figures were prepared with Adobe Illustrator. Movies were prepared with ChimeraX, VMD, and Adobe  
843 Procreate.

844

### 845 **Ligand docking to the drug binding pocket of MtrD**

846 To generate a starting position for our ligands of interest, we docked azithromycin and streptomycin  
847 with the periplasmic cleft of wild-type MtrD. The structures of the MtrD substrate azithromycin (AZY) and  
848 the non-substrate streptomycin (SRY) were downloaded from PubChem and converted to 3D structures  
849 using OpenBabel v. 2.3.2 [54]. The full-length (repaired) MtrD monomer and ligands were converted to  
850 PDBQT files using AutoDock Tools v. 1.5.6 [51]. AutoDock Vina 1.1.2 was then used to dock each ligand  
851 with four overlapping boxes that encompassed the entire periplasmic cleft of MtrD (S2 Fig) [28]. The  
852 docking exhaustiveness parameter was set to 128 replicates to ensure reasonable coverage of the docking  
853 regions; default exhaustiveness for AutoDock Vina is 8. Docking results were processed using in-house  
854 bash scripts, producing the top 9 poses of each ligand per dock box, ranked by binding affinity (S3 Fig).

855 To select ligand start sites for MD simulations, the resultant docking poses were then processed  
856 using AutoDock Tools. *The purpose of the docking experiments was to generate a plausible starting*  
857 *position for the ligand within the periplasmic cleft, not to evaluate individual estimated binding affinities.*  
858 Vina has an estimated standard error in calculating binding energies for small molecule redocking  
859 experiments of 2.85 kcal/mol [28]. Similar experiments for calculating the standard errors of affinity  
860 estimates for peptide- or protein-ligand complexes is expected to be much higher, due in large part to the  
861 significantly greater conformational degrees of freedom allowed for the ligand of interest. Consequently,  
862 the top 9 docking poses were evaluated according to position within the periplasmic cleft, and not to  
863 individual estimated affinities. We found that the overlapping dock boxes produced some identical docking  
864 poses (S3 Fig); from each cluster of identical poses, one representative pose was selected randomly. After  
865 the elimination of identical poses, three poses were selected for both AZY and SRY. For MD simulations  
866 with each ligand, we selected one docking pose at the Mid-Point of the cleft but within the proximal binding  
867 site – this became Start Site 1. We chose a second pose at the entrance of the periplasmic cleft – this became  
868 Start Site 2. The PDBQT files of ligands in each selected pose were converted to PDB format and “all  
869 atom” representations using Open Babel 2.3.2, since the PDB to PDBQT processing (for docking) removes  
870 all non-polar hydrogens [54].

871 The CHARMMGUI Ligand reader and Modeler were then used format the ligands as PDBs, to  
872 create parameter files for simulations with NAMD or AMBER, to create various protonation states if

873 applicable (S4 Fig), and to check for stereochemistry issues [24, 49]. Using available data (if possible) and  
874 analyses with Propka3.1 and OpenBabel, ligand protonation states were assessed at a physiologically  
875 relevant pH of 7.4 [54, 55]. At this pH, according to our calculations, SRY is a triple cation with only  
876 ~0.02% of molecules being double cations at pH 7.4. Therefore, we simulated the completely protonated  
877 form of streptomycin (SRY). For azithromycin (AZY), there are two ionizable sites (S4 Fig). For the first  
878 ionizable site, the pKa is ~8.5-8.74, meaning that ~4.6-7.9% of AZY are unprotonated at a pH of 7.4 [31,  
879 56]. For the second site, the pKa is 9.45, meaning that ~1% of AZY are unprotonated at this site [31]. Since  
880 it is thought that the neutral, unprotonated form of AZY may more readily diffuse through cell membranes,  
881 we included all three protonation states of AZY in our simulations.

882 We note also that pKa values may change depending upon the surrounding environment, and that  
883 the pKa of amines – of which there are two present on AZY – is expected to increase when moving from  
884 an aqueous to a more hydrophobic environment. This may result in higher percentages of the unprotonated  
885 form of these AZY in more hydrophobic environments. While these environments may increase the  
886 proportion of the unprotonated species of AZY, they are not expected to significantly change the  
887 protonation state of SRY (S4 Fig).

888

## 889 **TMD simulations of the ligand free system with NAMD**

890 TMD simulations, and the unbiased relaxation MD simulations that preceded TMD, were  
891 performed using NAMD 2.12 with the CHARMM36 forcefield, a timestep of 2 fs, and a non-bonding cutoff  
892 of 12 angstroms [25, 50]. Simulations were performed with constant temperature and pressure (NPT) in a  
893 periodic cell using Langevin temperature and pressure control, and Particle Mesh Ewald electrostatics. The  
894 temperature was maintained at 310K. As preparation for subsequent docking experiments and TMD  
895 simulations, the ligand-free system was minimized, heated to 310K, and equilibrated for 100 ns. An  
896 equilibrated MtrD monomer was extracted from the end of the final simulation and used for docking  
897 ligands, and also for aligning target structures for TMD simulations.

898



## 899 **Preparing the protein-ligand system**

900 After docking, each ligand was converted to a PDB and then uploaded, checked for structural or  
901 conformational issues, and parameterized using the CHARMM-GUI Ligand Reader and Modeller. After  
902 adding the ligand into the system and removing any overlapping water molecules using VMD, the new  
903 system was minimized, heated to 310K, and equilibrated in unbiased MD simulations for 50 ns. Using a  
904 short TMD simulation, the alpha carbons of the equilibrated system were then guided to the starting  
905 coordinates of the 4MT1 crystal trimer.

906

## 907 **Targeted Molecular Dynamics Simulations with NAMD**

908 To mimic a putative drug transport cycle of MtrD, TMD simulations were performed as previously  
909 described [57, 58] using target coordinates derived from structures of MtrD homologue(s) (S1 Fig). In our  
910 TMD simulations, alpha carbons of the protein backbone are guided to  $\leq 0.7$  Å of the target coordinates.  
911 Forces are not applied to the ligand of interest, and protein sidechains move freely. When simulations were  
912 performed, no published structures of MtrD in various conformations were available, so we used structures  
913 derived from AcrB from *E. coli*, which shares a sequence identity of 48.6%, and CmeB from *C. jejuni*,  
914 which shares a sequence identity of 38.07%, with MtrD. Structures used for TMD simulations were the  
915 4DX5 (1.9 Å) and 5NC5 (3.2 Å) structures of AcrB, and the 5LQ3 (3.5 Å) structure of CmeB (S1 Fig). A  
916 comparison of a normal (“wildtype”) MtrD, MtrD<sub>CR103</sub>, and the structures used in our TMD simulations, is  
917 provided in S9 Fig. Using the structurally homologous C $\alpha$  atoms of MtrD for each structure, target  
918 structures were superposed with the equilibrated MtrD-ligand system using the Bio3D module of R.

919 In subsequent TMD simulations on equilibrated protein-ligand systems, forces were applied using  
920 in-house *tcl* scripts in NAMD [58]. These forces were applied to selected C $\alpha$  atoms of the ligand-bound  
921 protomer to gently guide the C $\alpha$  atoms toward the respective target coordinates. The magnitudes of these  
922 forces were inversely proportional to the RMSD (root mean squared deviation) of the distances separating  
923 the selected C $\alpha$  atoms from their target coordinates. C $\alpha$  atoms were pushed to  $\leq 0.7$  Å of their target  
924 coordinates. Significant steric clashes were not observed between protomers, even though only one  
925 protomer was guided through conformational changes. Analysis of the protein-ligand interactions for each

926 system were performed using *tcl* scripts in VMD and the Bio3D R module. At equal intervals throughout  
927 each simulation, the number and characteristics of ligand-protein contacts were determined. Results are  
928 reported either for individual simulations or the averages for all twenty simulations.

929 We simulated three protonation states of the MtrD substrate azithromycin (AZY): AZY<sub>neu</sub>, a  
930 neutral, unprotonated form of azithromycin; AZY<sub>h1</sub>, a singly protonated, positively charged form of  
931 azithromycin; and AZY<sub>h2</sub>, doubly protonated, positively charged form of azithromycin (S4 Fig). As a  
932 negative control, we tested streptomycin (SRY), a known non-substrate of MtrD, and a triple cation at  
933 physiological pH. Two start sites were tested for each ligand – Site 1, in which the ligand was located in  
934 between the AP and the DP near the G-Loop, and was associating with the proximal binding site, and Site  
935 2, in which the ligand was at the entrance of the periplasmic cleft, and was associating with the foremost  
936 residues of the proximal binding site (Fig 2).

937 The center of mass coordinates, and ligand RMSDs from starting positions, were calculated using  
938 Tcl scripts in VMD. Protein-ligand systems were oriented such that the membrane is in the X – Y coordinate  
939 plane; therefore, *positive* vectorial movement along the X axis indicates movement through the periplasmic  
940 cleft *towards* the central region of MtrD, as would be expected during ligand transport. In contrast, *negative*  
941 vectorial movement along the X axis indicates movement *away* from the central region and towards the  
942 periplasm. Since biased external forces were not applied to the ligand, any movement through the protein  
943 should only be dependent upon the conformational changes of the MtrD protein and the limited diffusional  
944 possibilities of the transport substrate, which are dependent on the protein conformations.

945

## 946 **A long timescale MD simulation of AZY-bound MtrD**

947 Using the AMBER pmemd-cuda MD engine, we performed a GPU-accelerated, 1.5  $\mu$ s simulation  
948 of the MtrD homotrimer with AZY<sub>neu</sub> bound at Site 1 in the periplasmic cleft [23]. The ligand was  
949 parameterized with AMBER antechamber using the GAFF2 force field, and the protein-ligand system was  
950 built in AMBER tLEAP [23, 59, 60]. Except for parameterization files, the system was identical in  
951 composition and size to the system run with NAMD, except that the membrane did not contain cardiolipin;  
952 the heterogeneous membrane (POPE/POPG only), water, and ions were maintained. The system was first

953 relaxed in unbiased equilibration MD simulations for 200ns, and then allowed to run freely for a total of  
954 1.5  $\mu$ s. Analysis was performed using AMBER cpptraj, UCSF ChimeraX, the PDB2PQR server, in-house  
955 Tcl scripts with VMD or with python, and with Bio3D in R [23, 26, 48, 52, 53, 61].

956

## 957 **Molecular Lipophilicity Potential**

958 The molecular lipophilicity potential (MLP) describes the three-dimensional distribution of  
959 lipophilicity across the molecular surface of a molecule or protein. The MLP at a point in space (k) can be  
960 calculated using the following equation [42], where N is the number of molecular fragments,  $F_i$  is the  
961 lipophilic contribution of each molecular fragment (i), and the distance function  $f(d_{ik})$  describing the  
962 distance between the point (k) to the molecular fragment  $i$ :

963

$$964 \quad MLP_k = \sum_{i=1}^N F_i \cdot f(d_{ik})$$

965

966 The sum of all MLP values for the molecular surfaces of the periplasmic cleft yields the Lipophilic  
967 Index (LI) of that region, defined as:

$$968 \quad LI = \frac{\sum MLP^+}{\sum MLP^+ + |\sum MLP^-|} \times 100$$

969

970  $MLP^+$  denotes regions with a positive, or lipophilic, MLP value;  $MLP^-$  denotes regions with a negative, or  
971 hydrophilic, MLP value. If the fragmental contributions of the  $MLP^+$  and the  $MLP^-$  of a region sum to  
972 roughly zero, then the region is classified as MLP “neutral”.

973

## 974 **Electrostatic Potential**

975 The electrostatic potential (EP) surfaces of the periplasmic cleft were calculated using the  
976 APBS/PDB2PQR server and visualized using ChimeraX [61-63]. All EP calculations were performed at  
977 310K with all other Poisson-Boltzmann parameters at default. EP calculations were performed on MtrD

978 both in presence and absence of AZY by isolating PDB “snapshots” of the AZY-bound or ligand-free MtrD  
979 monomer from specific timepoints in the simulation; subsequent EP calculations were performed on these  
980 PDB snapshots using the APBS/PDB2PQR server.

981

## 982 **Percent hydration of solvent accessible surface area (SASA)**

983 The percent (%) hydration of the available SASA of each ligand was calculated as follows:

984

$$985 \quad \% \text{ Hydration of SASA} = \frac{\# H_2O \text{ at frame } N}{\# H_2O \text{ of Complete Hydration Layer}}$$

986

987 With N being the individual frame, or timepoint, analyzed. The complete potential hydration layer describes  
988 the number of water molecules that would surround the equilibrated ligand if it was immersed freely in  
989 solvent. The complete potential hydration layer was calculated by 1) immersing each ligand into a water  
990 box, 2) neutralizing the system with 0.15 mol/L NaCl, 3) minimizing the solvated system and heating it to  
991 310K, and 4) simulating the ligand with free MD for 20 ns. The position of water molecules within three  
992 different radii of AZY or SRY (radii of 3 Å, 4 Å, 5 Å, and 6 Å) were assessed to determine which radius  
993 describes a complete hydration layer around the ligand of interest. For both AZY and SRY, the optimal  
994 radius was water within 4 Å of any atom of the ligand. The number of water molecules to completely  
995 hydrate each ligand in its free-MD relaxed state was determined to be as follows: AZY<sub>neu</sub> , 107 water  
996 molecules; AZY<sub>h1</sub> , 103 water molecules; AZY<sub>h2</sub> , 104 water molecules; SRY, 83 water molecules. The  
997 SASA was calculated using the “measure” function of VMD.

998

## 999 **Molecular modeling of the fully-assembled MtrCDE complex**

1000 Since the structure of MtrC remains unsolved, we used the structure of the homologous membrane fusion  
1001 protein AcrA from the AcrAB-TolC RND Efflux system; AcrA shares a 44.6% sequence identity with MtrC  
1002 (PDB ID 5NG5) [41]. Like AcrAB-TolC, the MtrCDE RND efflux system also assembles with a 3:6:3  
1003 stoichiometry, indicating that MtrC assembles as a hexamer [43]. A full model of MtrCDE was

1004 subsequently built using the structures of apo MtrD (4MT1), open MtrE (4MTO), and the model of MtrC  
1005 [6, 44]. To assemble MtrCDE with the appropriate stoichiometry and positioning of subunits, we used the  
1006 structure of fully-assembled AcrAB-TolC (5NG5) was used as a template [41]. The MtrCDE model is  
1007 shown in S7 Fig. We note that a significant flexible linker, residues 378 - 397, is missing from the 5NG5  
1008 structure of AcrA, and therefore the homology model of MtrC.

## 1009 **References**

- 1010 1. Wade JJ, Graver MA. Survival of six auxotypes of *Neisseria gonorrhoeae* in transport media. *J Clin*  
1011 *Microbiol.* 2003;41(4):1720-1. Epub 2003/04/12. doi: 10.1128/jcm.41.4.1720-1721.2003. PubMed  
1012 PMID: 12682168; PubMed Central PMCID: PMCPMC153907.
- 1013 2. Rowley J, Vander Hoorn S, Korenromp E, Low N, Unemo M, Abu-Raddad LJ, et al. Chlamydia,  
1014 gonorrhoea, trichomoniasis and syphilis: global prevalence and incidence estimates, 2016. *Bull World*  
1015 *Health Organ.* 2019;97(8):548-62P. Epub 2019/08/07. doi: 10.2471/BLT.18.228486. PubMed PMID:  
1016 31384073; PubMed Central PMCID: PMCPMC6653813.
- 1017 3. Smolarchuk C, Wensley A, Padfield S, Fifer H, Lee A, Hughes G. Persistence of an outbreak of  
1018 gonorrhoea with high-level resistance to azithromycin in England, November 2014-May 2018. *Euro*  
1019 *Surveill.* 2018;23(23). Epub 2018/06/14. doi: 10.2807/1560-7917.ES.2018.23.23.1800287. PubMed  
1020 PMID: 29897041; PubMed Central PMCID: PMCPMC6152168.
- 1021 4. Nikaïdo H. RND transporters in the living world. *Res Microbiol.* 2018;169(7-8):363-71. Epub  
1022 2018/03/27. doi: 10.1016/j.resmic.2018.03.001. PubMed PMID: 29577985; PubMed Central PMCID:  
1023 PMCPMC6151166.
- 1024 5. Anes J, McCusker MP, Fanning S, Martins M. The ins and outs of RND efflux pumps in *Escherichia*  
1025 *coli.* *Front Microbiol.* 2015;6:587. Epub 2015/06/27. doi: 10.3389/fmicb.2015.00587. PubMed PMID:  
1026 26113845; PubMed Central PMCID: PMCPMC4462101.
- 1027 6. Bolla JR, Su CC, Do SV, Radhakrishnan A, Kumar N, Long F, et al. Crystal structure of the *Neisseria*  
1028 *gonorrhoeae* MtrD inner membrane multidrug efflux pump. *PLoS One.* 2014;9(6):e97903. Epub  
1029 2014/06/06. doi: 10.1371/journal.pone.0097903. PubMed PMID: 24901477; PubMed Central PMCID:  
1030 PMCPMC4046932.
- 1031 7. Hagman KE, Lucas CE, Balthazar JT, Snyder L, Nilles M, Judd RC, et al. The MtrD protein of *Neisseria*  
1032 *gonorrhoeae* is a member of the resistance/nodulation/division protein family constituting part of an  
1033 efflux system. *Microbiology.* 1997;143 ( Pt 7):2117-25. Epub 1997/07/01. doi: 10.1099/00221287-143-  
1034 7-2117. PubMed PMID: 9245801.
- 1035 8. Unemo M, Shafer WM. Antimicrobial resistance in *Neisseria gonorrhoeae* in the 21st century: past,  
1036 evolution, and future. *Clin Microbiol Rev.* 2014;27(3):587-613. Epub 2014/07/02. doi:  
1037 10.1128/CMR.00010-14. PubMed PMID: 24982323; PubMed Central PMCID: PMCPMC4135894.
- 1038 9. Chitsaz M, Booth L, Blyth MT, O'Mara ML, Brown MH. Multidrug Resistance in *Neisseria*  
1039 *gonorrhoeae*: Identification of Functionally Important Residues in the MtrD Efflux Protein. *mBio.*  
1040 2019;10(6). Epub 2019/11/21. doi: 10.1128/mBio.02277-19. PubMed PMID: 31744915; PubMed  
1041 Central PMCID: PMCPMC6867893.
- 1042 10. Warner DM, Shafer WM, Jerse AE. Clinically relevant mutations that cause derepression of the  
1043 *Neisseria gonorrhoeae* MtrC-MtrD-MtrE Efflux pump system confer different levels of antimicrobial  
1044 resistance and in vivo fitness. *Mol Microbiol.* 2008;70(2):462-78. Epub 2008/09/03. doi:  
1045 10.1111/j.1365-2958.2008.06424.x. PubMed PMID: 18761689; PubMed Central PMCID:  
1046 PMCPMC2602950.
- 1047 11. Jerse AE, Sharma ND, Simms AN, Crow ET, Snyder LA, Shafer WM. A gonococcal efflux pump  
1048 system enhances bacterial survival in a female mouse model of genital tract infection. *Infect Immun.*  
1049 2003;71(10):5576-82. Epub 2003/09/23. doi: 10.1128/iai.71.10.5576-5582.2003. PubMed PMID:  
1050 14500476; PubMed Central PMCID: PMCPMC201053.
- 1051 12. Warner DM, Folster JP, Shafer WM, Jerse AE. Regulation of the MtrC-MtrD-MtrE efflux-pump  
1052 system modulates the in vivo fitness of *Neisseria gonorrhoeae*. *J Infect Dis.* 2007;196(12):1804-12.  
1053 Epub 2008/01/15. doi: 10.1086/522964. PubMed PMID: 18190261.
- 1054 13. Lyu M, Moseng MA, Reimche JL, Holley CL, Dhulipala V, Su CC, et al. Cryo-EM Structures of a  
1055 Gonococcal Multidrug Efflux Pump Illuminate a Mechanism of Drug Recognition and Resistance.  
1056 *mBio.* 2020;11(3). Epub 2020/05/28. doi: 10.1128/mBio.00996-20. PubMed PMID: 32457251;  
1057 PubMed Central PMCID: PMCPMC7251214.

- 1058 14. Eicher T, Seeger MA, Anselmi C, Zhou W, Brandstatter L, Verrey F, et al. Coupling of remote  
1059 alternating-access transport mechanisms for protons and substrates in the multidrug efflux pump AcrB.  
1060 *Elife*. 2014;3. Epub 2014/09/24. doi: 10.7554/eLife.03145. PubMed PMID: 25248080; PubMed  
1061 Central PMCID: PMCPMC4359379.
- 1062 15. Matsunaga Y, Yamane T, Terada T, Moritsugu K, Fujisaki H, Murakami S, et al. Energetics and  
1063 conformational pathways of functional rotation in the multidrug transporter AcrB. *Elife*. 2018;7. Epub  
1064 2018/03/07. doi: 10.7554/eLife.31715. PubMed PMID: 29506651; PubMed Central PMCID:  
1065 PMCPMC5839741.
- 1066 16. Nakashima R, Sakurai K, Yamasaki S, Nishino K, Yamaguchi A. Structures of the multidrug exporter  
1067 AcrB reveal a proximal multisite drug-binding pocket. *Nature*. 2011;480(7378):565-9. Epub  
1068 2011/11/29. doi: 10.1038/nature10641. PubMed PMID: 22121023.
- 1069 17. Su CC, Yin L, Kumar N, Dai L, Radhakrishnan A, Bolla JR, et al. Structures and transport dynamics  
1070 of a *Campylobacter jejuni* multidrug efflux pump. *Nat Commun*. 2017;8(1):171. Epub 2017/08/02. doi:  
1071 10.1038/s41467-017-00217-z. PubMed PMID: 28761097; PubMed Central PMCID:  
1072 PMCPMC5537355.
- 1073 18. Murakami S, Nakashima R, Yamashita E, Matsumoto T, Yamaguchi A. Crystal structures of a  
1074 multidrug transporter reveal a functionally rotating mechanism. *Nature*. 2006;443(7108):173-9. Epub  
1075 2006/08/18. doi: 10.1038/nature05076. PubMed PMID: 16915237.
- 1076 19. Du D, Voss J, Wang Z, Chiu W, Luisi BF. The pseudo-atomic structure of an RND-type tripartite  
1077 multidrug efflux pump. *Biol Chem*. 2015;396(9-10):1073-82. Epub 2015/03/25. doi: 10.1515/hsz-  
1078 2015-0118. PubMed PMID: 25803077.
- 1079 20. Eicher T, Cha HJ, Seeger MA, Brandstatter L, El-Delik J, Bohnert JA, et al. Transport of drugs by the  
1080 multidrug transporter AcrB involves an access and a deep binding pocket that are separated by a switch-  
1081 loop. *Proc Natl Acad Sci U S A*. 2012;109(15):5687-92. Epub 2012/03/28. doi:  
1082 10.1073/pnas.1114944109. PubMed PMID: 22451937; PubMed Central PMCID: PMCPMC3326505.
- 1083 21. Ramaswamy VK, Vargiu AV, Mallocci G, Dreier J, Ruggerone P. Molecular Determinants of the  
1084 Promiscuity of MexB and MexY Multidrug Transporters of *Pseudomonas aeruginosa*. *Front Microbiol*.  
1085 2018;9:1144. Epub 2018/06/19. doi: 10.3389/fmicb.2018.01144. PubMed PMID: 29910784; PubMed  
1086 Central PMCID: PMCPMC5992780.
- 1087 22. Salomon-Ferrer R, Gotz AW, Poole D, Le Grand S, Walker RC. Routine Microsecond Molecular  
1088 Dynamics Simulations with AMBER on GPUs. 2. Explicit Solvent Particle Mesh Ewald. *J Chem  
1089 Theory Comput*. 2013;9(9):3878-88. Epub 2013/09/10. doi: 10.1021/ct400314y. PubMed PMID:  
1090 26592383.
- 1091 23. D.A. Case IYB-S, S.R. Brozell, D.S. Cerutti, T.E. Cheatham, III, V.W.D. Cruzeiro, T.A. Darden, R.E.  
1092 Duke, D. Ghoreishi, G. Giambasu, T. Giese, M.K. Gilson, H. Gohlke, A.W. Goetz, D. Greene, R Harris,  
1093 N. Homeyer, Y. Huang, S. Izadi, A. Kovalenko, R. Krasny, T. Kurtzman, T.S. Lee, S. LeGrand, P. Li,  
1094 C. Lin, J. Liu, T. Luchko, R. Luo, V. Man, D.J. Mermelstein, K.M. Merz, Y. Miao, G. Monard, C.  
1095 Nguyen, H. Nguyen, A. Onufriev, F. Pan, R. Qi, D.R. Roe, A. Roitberg, C. Sagui, S. Schott-Verdugo,  
1096 J. Shen, C.L. Simmerling, J. Smith, J. Swails, R.C. Walker, J. Wang, H. Wei, L. Wilson, R.M. Wolf,  
1097 X. Wu, L. Xiao, Y. Xiong, D.M. York and P.A. Kollman AMBER 2019. University of California, San  
1098 Francisco; 2019.
- 1099 24. Lee J, Cheng X, Swails JM, Yeom MS, Eastman PK, Lemkul JA, et al. CHARMM-GUI Input  
1100 Generator for NAMD, GROMACS, AMBER, OpenMM, and CHARMM/OpenMM Simulations Using  
1101 the CHARMM36 Additive Force Field. *J Chem Theory Comput*. 2016;12(1):405-13. Epub 2015/12/04.  
1102 doi: 10.1021/acs.jctc.5b00935. PubMed PMID: 26631602; PubMed Central PMCID:  
1103 PMCPMC4712441.
- 1104 25. Phillips JC, Braun R, Wang W, Gumbart J, Tajkhorshid E, Villa E, et al. Scalable molecular dynamics  
1105 with NAMD. *J Comput Chem*. 2005;26(16):1781-802. Epub 2005/10/14. doi: 10.1002/jcc.20289.  
1106 PubMed PMID: 16222654; PubMed Central PMCID: PMCPMC2486339.
- 1107 26. D.A. Case RMB, D.S. Cerutti, T.E. Cheatham, III, T.A. Darden, R.E. Duke, T.J. Giese, H. Gohlke,,  
1108 A.W. Goetz NH, S. Izadi, P. Janowski, J. Kaus, A. Kovalenko, T.S. Lee, S. LeGrand, P. Li, C., Lin TL,

- 1109 R. Luo, B. Madej, D. Mermelstein, K.M. Merz, G. Monard, H. Nguyen, H.T. Nguyen, I., Omelyan AO,  
1110 D.R. Roe, A. Roitberg, C. Sagui, C.L. Simmerling, W.M. Botello-Smith, J. Swails,, R.C. Walker JW,  
1111 R.M. Wolf, X. Wu, L. Xiao and P.A. Kollman. AMBER 2016. University of California, San  
1112 Francisco2016.
- 1113 27. Case DA, Cheatham TE, 3rd, Darden T, Gohlke H, Luo R, Merz KM, Jr., et al. The Amber biomolecular  
1114 simulation programs. *J Comput Chem.* 2005;26(16):1668-88. Epub 2005/10/04. doi:  
1115 10.1002/jcc.20290. PubMed PMID: 16200636; PubMed Central PMCID: PMCPMC1989667.
- 1116 28. Trott O, Olson AJ. AutoDock Vina: improving the speed and accuracy of docking with a new scoring  
1117 function, efficient optimization, and multithreading. *J Comput Chem.* 2010;31(2):455-61. Epub  
1118 2009/06/06. doi: 10.1002/jcc.21334. PubMed PMID: 19499576; PubMed Central PMCID:  
1119 PMCPMC3041641.
- 1120 29. Webb B, Sali A. Comparative Protein Structure Modeling Using MODELLER. *Curr Protoc Protein*  
1121 *Sci.* 2016;86:2 9 1-2 9 37. Epub 2016/11/02. doi: 10.1002/cpps.20. PubMed PMID: 27801516.
- 1122 30. Hanamoto S, Ogawa F. Predicting the sorption of azithromycin and levofloxacin to sediments from  
1123 mineral and organic components. *Environ Pollut.* 2019;255(Pt 1):113180. Epub 2019/09/17. doi:  
1124 10.1016/j.envpol.2019.113180. PubMed PMID: 31525559.
- 1125 31. McFarland JW, Berger CM, Froshauer SA, Hayashi SF, Hecker SJ, Jaynes BH, et al. Quantitative  
1126 structure-activity relationships among macrolide antibacterial agents: in vitro and in vivo potency  
1127 against *Pasteurella multocida*. *J Med Chem.* 1997;40(9):1340-6. Epub 1997/04/25. doi:  
1128 10.1021/jm960436i. PubMed PMID: 9135031.
- 1129 32. Tim Isgro JP, Marcos Sotomayor, Elizabeth Villa, Hang Yu, David Tanner, Yanxin Liu, Zhe Wu, David  
1130 Hardy. NAMD Tutorial: Theoretical and Computational Biophysics Group, University of Illinois at  
1131 Urbana-Champaign; [cited 2021 1/14/2021]. Available from:  
1132 <https://www.ks.uiuc.edu/Training/Tutorials/namd/namd-tutorial-win.pdf>.
- 1133 33. AMBER Histidine residues 2015 [updated 3 May 2020; cited 2021 1/14/2021]. Available from:  
1134 <http://ambermd.org/Questions/HIS.html>.
- 1135 34. Alberts B JA, Lewis J, et al. *Molecular Biology of the Cell*. 4th Edition. In: Figure 14-32 tIoH-DTiB,  
1136 editor. New York: Garland; 2002.
- 1137 35. Vargiu AV, Ramaswamy VK, Malvacio I, Malloci G, Kleinekathofer U, Ruggerone P. Water-mediated  
1138 interactions enable smooth substrate transport in a bacterial efflux pump. *Biochim Biophys Acta Gen*  
1139 *Subj.* 2018;1862(4):836-45. Epub 2018/01/18. doi: 10.1016/j.bbagen.2018.01.010. PubMed PMID:  
1140 29339082.
- 1141 36. D'Arrigo JS. Screening of membrane surface charges by divalent cations: an atomic representation. *Am*  
1142 *J Physiol.* 1978;235(3):C109-17. Epub 1978/09/01. doi: 10.1152/ajpcell.1978.235.3.C109. PubMed  
1143 PMID: 696813.
- 1144 37. Rouquette-Loughlin CE, Reimche JL, Balthazar JT, Dhulipala V, Gernert KM, Kersh EN, et al.  
1145 Mechanistic Basis for Decreased Antimicrobial Susceptibility in a Clinical Isolate of *Neisseria*  
1146 *gonorrhoeae* Possessing a Mosaic-Like mtr Efflux Pump Locus. *mBio.* 2018;9(6). Epub 2018/11/30.  
1147 doi: 10.1128/mBio.02281-18. PubMed PMID: 30482834; PubMed Central PMCID:  
1148 PMCPMC6282211.
- 1149 38. Lomize MA, Pogozheva ID, Joo H, Mosberg HI, Lomize AL. OPM database and PPM web server:  
1150 resources for positioning of proteins in membranes. *Nucleic Acids Res.* 2012;40(Database issue):D370-  
1151 6. Epub 2011/09/06. doi: 10.1093/nar/gkr703. PubMed PMID: 21890895; PubMed Central PMCID:  
1152 PMCPMC3245162.
- 1153 39. Nikaido H, Takatsuka Y. Mechanisms of RND multidrug efflux pumps. *Biochim Biophys Acta.*  
1154 2009;1794(5):769-81. Epub 2008/11/26. doi: 10.1016/j.bbapap.2008.10.004. PubMed PMID:  
1155 19026770; PubMed Central PMCID: PMCPMC2696896.
- 1156 40. Murzyn K, Rog T, Pasenkiewicz-Gierula M. Phosphatidylethanolamine-phosphatidylglycerol bilayer  
1157 as a model of the inner bacterial membrane. *Biophys J.* 2005;88(2):1091-103. Epub 2004/11/24. doi:  
1158 10.1529/biophysj.104.048835. PubMed PMID: 15556990; PubMed Central PMCID:  
1159 PMCPMC1305115.



- 1160 41. Wang Z, Fan G, Hryc CF, Blaza JN, Serysheva, II, Schmid MF, et al. An allosteric transport mechanism  
1161 for the AcrAB-TolC multidrug efflux pump. *Elife*. 2017;6. Epub 2017/03/30. doi:  
1162 10.7554/eLife.24905. PubMed PMID: 28355133; PubMed Central PMCID: PMC5404916.
- 1163 42. Gaillard P, Carrupt PA, Testa B, Boudon A. Molecular lipophilicity potential, a tool in 3D QSAR:  
1164 method and applications. *J Comput Aided Mol Des*. 1994;8(2):83-96. Epub 1994/04/01. doi:  
1165 10.1007/BF00119860. PubMed PMID: 7914913.
- 1166 43. Janganan TK, Bavro VN, Zhang L, Matak-Vinkovic D, Barrera NP, Venien-Bryan C, et al. Evidence  
1167 for the assembly of a bacterial tripartite multidrug pump with a stoichiometry of 3:6:3. *J Biol Chem*.  
1168 2011;286(30):26900-12. Epub 2011/05/26. doi: 10.1074/jbc.M111.246595. PubMed PMID:  
1169 21610073; PubMed Central PMCID: PMC3143649.
- 1170 44. Lei HT, Chou TH, Su CC, Bolla JR, Kumar N, Radhakrishnan A, et al. Crystal structure of the open  
1171 state of the *Neisseria gonorrhoeae* MtrE outer membrane channel. *PLoS One*. 2014;9(6):e97475. Epub  
1172 2014/06/06. doi: 10.1371/journal.pone.0097475. PubMed PMID: 24901251; PubMed Central PMCID:  
1173 PMC4046963.
- 1174 45. Schulz R, Vargiu AV, Collu F, Kleinekathofer U, Ruggerone P. Functional rotation of the transporter  
1175 AcrB: insights into drug extrusion from simulations. *PLoS Comput Biol*. 2010;6(6):e1000806. Epub  
1176 2010/06/16. doi: 10.1371/journal.pcbi.1000806. PubMed PMID: 20548943; PubMed Central PMCID:  
1177 PMC2883587.
- 1178 46. Aron Z, Opperman TJ. The hydrophobic trap-the Achilles heel of RND efflux pumps. *Res Microbiol*.  
1179 2018;169(7-8):393-400. Epub 2017/11/18. doi: 10.1016/j.resmic.2017.11.001. PubMed PMID:  
1180 29146106; PubMed Central PMCID: PMC5949246.
- 1181 47. Vargiu AV, Nikaido H. Multidrug binding properties of the AcrB efflux pump characterized by  
1182 molecular dynamics simulations. *Proc Natl Acad Sci U S A*. 2012;109(50):20637-42. Epub 2012/11/24.  
1183 doi: 10.1073/pnas.1218348109. PubMed PMID: 23175790; PubMed Central PMCID:  
1184 PMC3528587.
- 1185 48. Humphrey W, Dalke A, Schulten K. VMD: visual molecular dynamics. *J Mol Graph*. 1996;14(1):33-  
1186 8, 27-8. Epub 1996/02/01. doi: 10.1016/0263-7855(96)00018-5. PubMed PMID: 8744570.
- 1187 49. Jo S, Kim T, Iyer VG, Im W. CHARMM-GUI: a web-based graphical user interface for CHARMM. *J*  
1188 *Comput Chem*. 2008;29(11):1859-65. Epub 2008/03/21. doi: 10.1002/jcc.20945. PubMed PMID:  
1189 18351591.
- 1190 50. Brooks BR, Brooks CL, 3rd, Mackerell AD, Jr., Nilsson L, Petrella RJ, Roux B, et al. CHARMM: the  
1191 biomolecular simulation program. *J Comput Chem*. 2009;30(10):1545-614. Epub 2009/05/16. doi:  
1192 10.1002/jcc.21287. PubMed PMID: 19444816; PubMed Central PMCID: PMC2810661.
- 1193 51. Morris GM, Huey R, Lindstrom W, Sanner MF, Belew RK, Goodsell DS, et al. AutoDock4 and  
1194 AutoDockTools4: Automated docking with selective receptor flexibility. *J Comput Chem*.  
1195 2009;30(16):2785-91. Epub 2009/04/29. doi: 10.1002/jcc.21256. PubMed PMID: 19399780; PubMed  
1196 Central PMCID: PMC2760638.
- 1197 52. Grant BJ, Rodrigues AP, ElSawy KM, McCammon JA, Caves LS. Bio3d: an R package for the  
1198 comparative analysis of protein structures. *Bioinformatics*. 2006;22(21):2695-6. Epub 2006/08/31. doi:  
1199 10.1093/bioinformatics/btl461. PubMed PMID: 16940322.
- 1200 53. Goddard TD, Huang CC, Meng EC, Pettersen EF, Couch GS, Morris JH, et al. UCSF ChimeraX:  
1201 Meeting modern challenges in visualization and analysis. *Protein Sci*. 2018;27(1):14-25. Epub  
1202 2017/07/16. doi: 10.1002/pro.3235. PubMed PMID: 28710774; PubMed Central PMCID:  
1203 PMC5734306.
- 1204 54. O'Boyle NM, Banck M, James CA, Morley C, Vandermeersch T, Hutchison GR. Open Babel: An open  
1205 chemical toolbox. *J Cheminform*. 2011;3:33. Epub 2011/10/11. doi: 10.1186/1758-2946-3-33. PubMed  
1206 PMID: 21982300; PubMed Central PMCID: PMC3198950.
- 1207 55. Rostkowski M, Olsson MH, Sondergaard CR, Jensen JH. Graphical analysis of pH-dependent  
1208 properties of proteins predicted using PROPKA. *BMC Struct Biol*. 2011;11:6. Epub 2011/01/29. doi:  
1209 10.1186/1472-6807-11-6. PubMed PMID: 21269479; PubMed Central PMCID: PMC3038139.

- 1210 56. Kong FY, Rupasinghe TW, Simpson JA, Vodstrcil LA, Fairley CK, McConville MJ, et al.  
1211 Pharmacokinetics of a single 1g dose of azithromycin in rectal tissue in men. *PLoS One*.  
1212 2017;12(3):e0174372. Epub 2017/03/30. doi: 10.1371/journal.pone.0174372. PubMed PMID:  
1213 28350806; PubMed Central PMCID: PMC5370104.
- 1214 57. McCormick JW, Vogel PD, Wise JG. Multiple Drug Transport Pathways through Human P-  
1215 Glycoprotein. *Biochemistry*. 2015;54(28):4374-90. Epub 2015/07/10. doi:  
1216 10.1021/acs.biochem.5b00018. PubMed PMID: 26125482; PubMed Central PMCID:  
1217 PMC527178.
- 1218 58. Wise JG. Catalytic transitions in the human MDR1 P-glycoprotein drug binding sites. *Biochemistry*.  
1219 2012;51(25):5125-41. Epub 2012/06/12. doi: 10.1021/bi300299z. PubMed PMID: 22647192; PubMed  
1220 Central PMCID: PMC3383123.
- 1221 59. Wang J, Wang W, Kollman PA, Case DA. Automatic atom type and bond type perception in molecular  
1222 mechanical calculations. *J Mol Graph Model*. 2006;25(2):247-60. Epub 2006/02/07. doi:  
1223 10.1016/j.jmgl.2005.12.005. PubMed PMID: 16458552.
- 1224 60. Wang J, Wolf RM, Caldwell JW, Kollman PA, Case DA. Development and testing of a general amber  
1225 force field. *J Comput Chem*. 2004;25(9):1157-74. Epub 2004/04/30. doi: 10.1002/jcc.20035. PubMed  
1226 PMID: 15116359.
- 1227 61. Dolinsky TJ, Czodrowski P, Li H, Nielsen JE, Jensen JH, Klebe G, et al. PDB2PQR: expanding and  
1228 upgrading automated preparation of biomolecular structures for molecular simulations. *Nucleic Acids*  
1229 *Res*. 2007;35(Web Server issue):W522-5. Epub 2007/05/10. doi: 10.1093/nar/gkm276. PubMed  
1230 PMID: 17488841; PubMed Central PMCID: PMC1933214.
- 1231 62. Baker NA, Sept D, Joseph S, Holst MJ, McCammon JA. Electrostatics of nanosystems: application to  
1232 microtubules and the ribosome. *Proc Natl Acad Sci U S A*. 2001;98(18):10037-41. Epub 2001/08/23.  
1233 doi: 10.1073/pnas.181342398. PubMed PMID: 11517324; PubMed Central PMCID: PMC56910.
- 1234 63. Dolinsky TJ, Nielsen JE, McCammon JA, Baker NA. PDB2PQR: an automated pipeline for the setup  
1235 of Poisson-Boltzmann electrostatics calculations. *Nucleic Acids Res*. 2004;32(Web Server  
1236 issue):W665-7. Epub 2004/06/25. doi: 10.1093/nar/gkh381. PubMed PMID: 15215472; PubMed  
1237 Central PMCID: PMC441519.
- 1238 64. ACE and JChem acidity and basicity Calculator. ACE UKY-4.0  
1239 ed. <https://epoch.uky.edu/ace/public/pKa.jsp>; Marvin JS, ChemAxon.
- 1240 65. Daina A, Michielin O, Zoete V. SwissADME: a free web tool to evaluate pharmacokinetics, drug-  
1241 likeness and medicinal chemistry friendliness of small molecules. *Sci Rep*. 2017;7:42717. Epub  
1242 2017/03/04. doi: 10.1038/srep42717. PubMed PMID: 28256516; PubMed Central PMCID:  
1243 PMC5335600.
- 1244

## 1245 Supporting information

**A.** MtrD monomer, viewed from the periplasm.

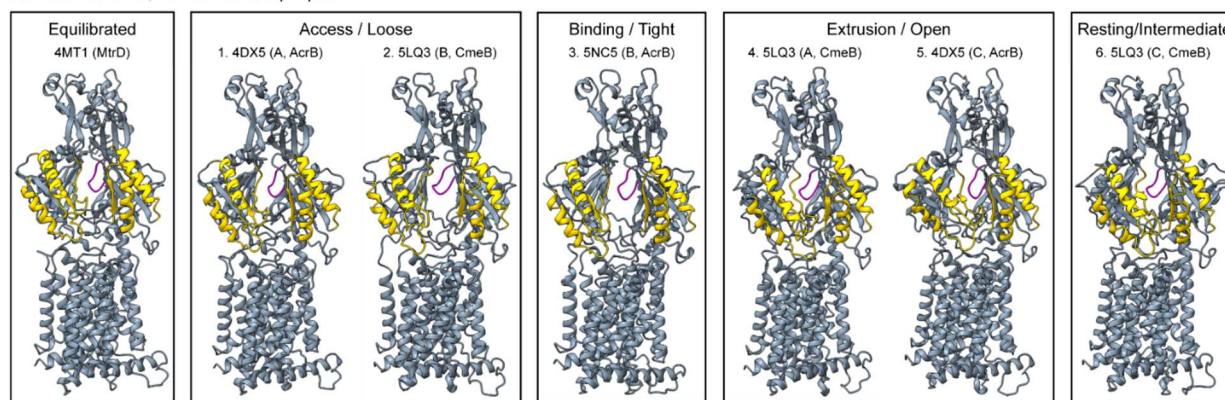

**B.** MtrD Drug Binding Pocket, rotated 180°, viewed from the periplasm.

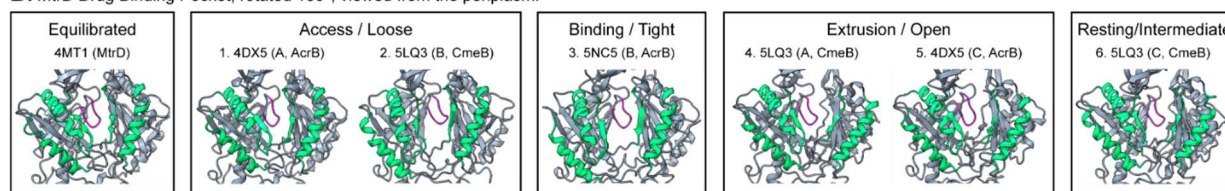

1246

1247 **S1 Fig. Modeling a Putative Catalytic Transport Cycle of MtrD using MtrD Homologues.** (A) The  
1248 MtrD monomer viewed from the periplasm, with helices of the Access Pocket colored yellow for visibility,  
1249 and the G-Loop colored magenta. Here we show all of the structures of MtrD homologues, in order, that  
1250 were used to model a putative catalytic efflux cycle of MtrD with TMD simulations. The overall title of the  
1251 stage of transport – Access, Binding, Extrusion, Transition (Intermediate) is above the structures used; the  
1252 PDB ID of the structure is numbered in all caps, the specific chain of the PDB, as well as the name of the  
1253 source protein, are in parentheses. (B) The periplasmic cleft of the MtrD monomer viewed from the back,  
1254 or from the center of the transporter. Helices of the Deep Pocket are colored green, the G-Loop is in  
1255 magenta. These images are the same structures as in (A) but rotated 180° and viewed from the back.

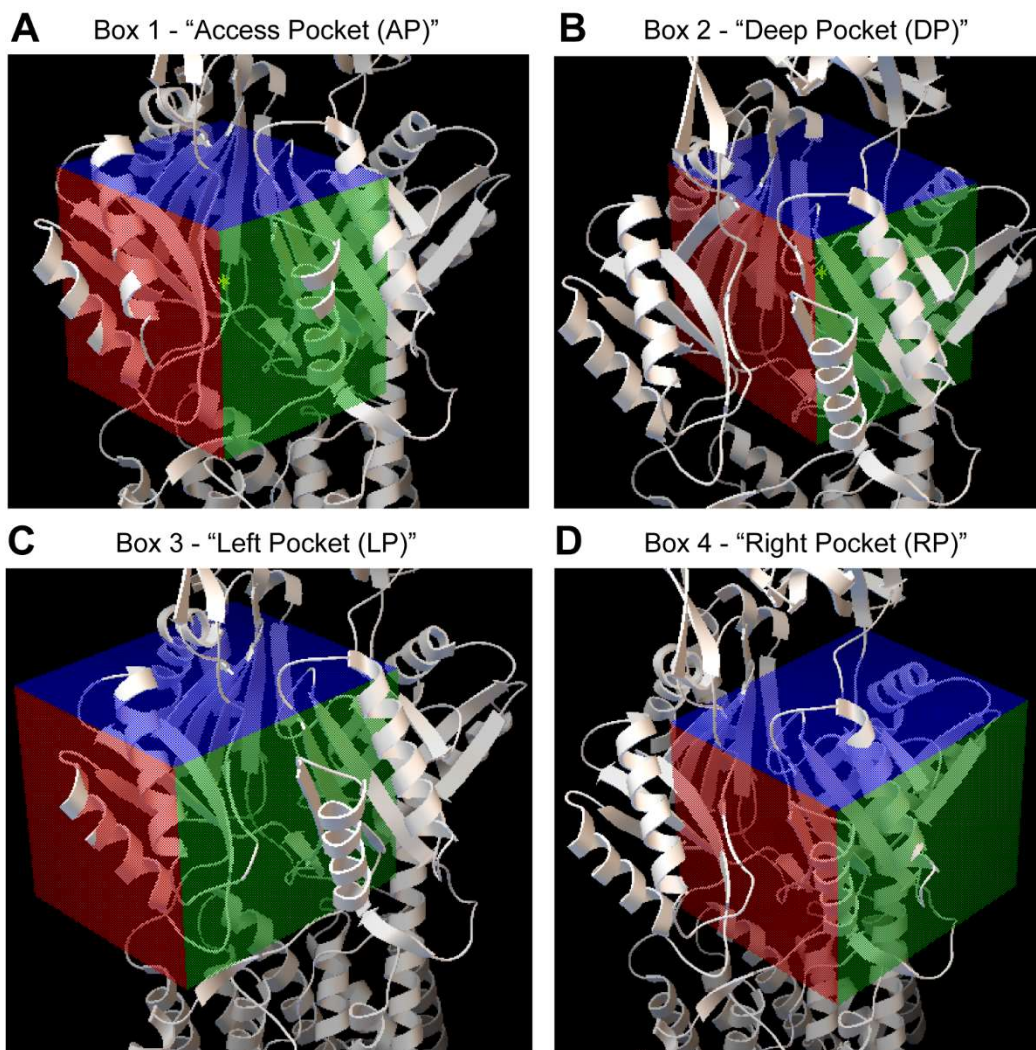

1256  
1257

1258 **S2 Fig. Docking Search Areas used for Docking Streptomycin and Azithromycin to the Periplasmic**  
1259 **Cleft of MtrD.**

1260 Docking search areas were designed with a spacing of 1 angstrom using Autodock Tools; docking search  
1261 areas were also chosen with significant overlap to ensure that the periplasmic cleft was adequately sampled.  
1262 Docking experiments were performed with *Autodock Vina* and an exhaustiveness of 128 (default is 8). (A-  
1263 B) The dimensions of the Access Pocket and Deep Pocket docking boxes are 26 x 30 x 28. (C-D) The  
1264 dimensions of the Left Pocket and Right Pocket docking boxes are 36 x 30 x 30. Streptomycin and  
1265 Azithromycin were docked against the periplasmic cleft using each of these four docking boxes, as  
1266 described in Methods.  
1267

1268

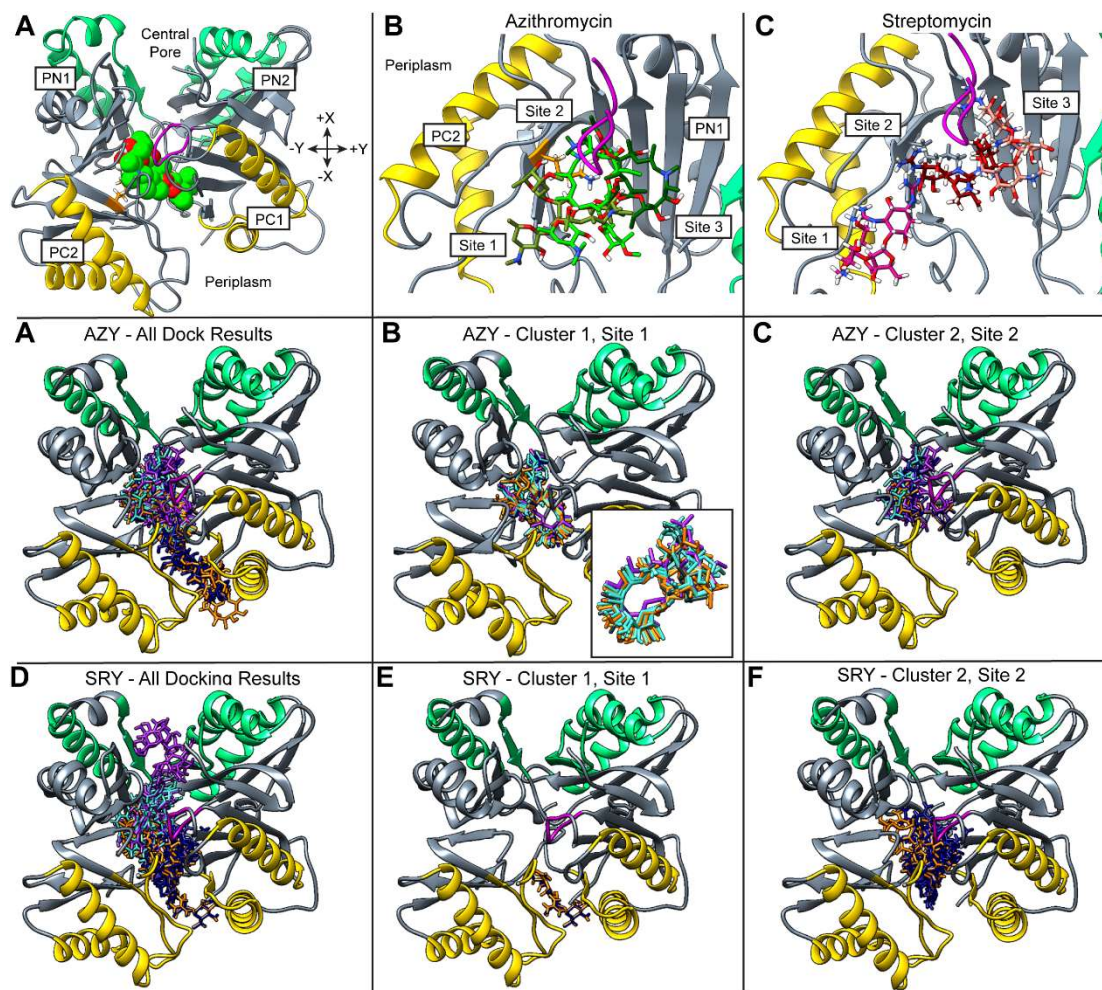

1269  
1270

1271 **S3 Fig. Ligand Docking Poses and Selection of Start Sites for TMD Simulations.**

1272 Panels (A-H) show the periplasmic cleft of MtrD viewed from the top (i.e. periplasm) down, with helices  
 1273 of the Access Pocket colored yellow, and helices of the Deep Pocket colored green, for aid in reader  
 1274 orientation. The Access Pocket is exposed to the periplasm, and the Deep Pocket opens into the interior of  
 1275 the MtrD transporter. All resultant docking poses of streptomycin (SRY) and azithromycin (AZY) are  
 1276 shown in stick representation. (A) All docking results of AZY overlaid, from all four dock boxes shown in  
 1277 S2 Fig. (B) Docking cluster 1, this was the most occupied cluster for azithromycin, with a zoom-in showing  
 1278 the overlapping poses; this cluster was the basis for Site 1. (C) the second most occupied docking cluster  
 1279 of azithromycin, this cluster was the basis for Site 2. (D) the third most occupied cluster; this cluster was  
 1280 the basis for Site 3. (E) All docking results of SRY overlaid from all four dock boxes. (F) The Access  
 1281 Pocket cluster that was the basis for Site 1. (G) the second most occupied cluster; this cluster was the basis  
 1282 for Site 2. (H) the third most occupied cluster, this was the basis for Site 3.  
 1283

1284

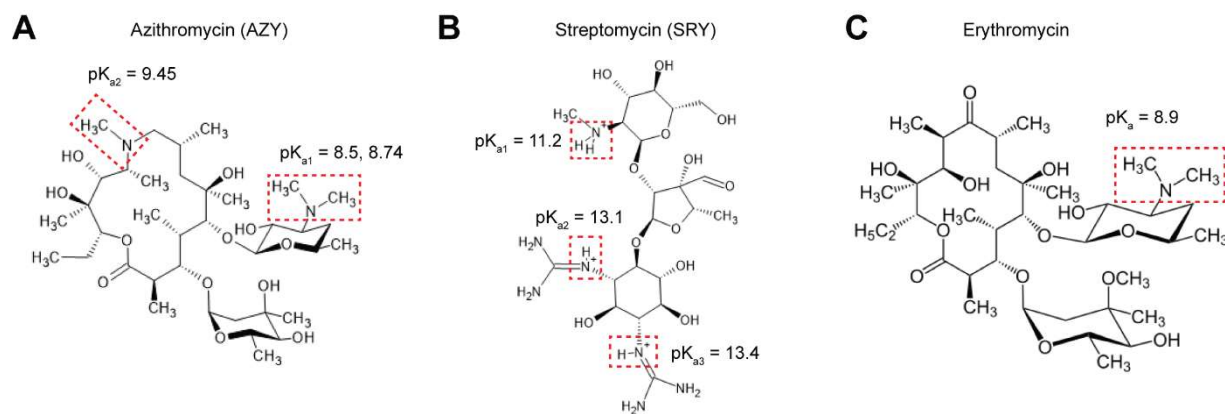

1285

1286 **S4 Fig. Structures of Azithromycin (AZY), Streptomycin (SRY), and Erythromycin**

1287 Panels show the molecular structure, protonation sites, and relative pKas of **A)** azithromycin (AZY), **B)**  
 1288 streptomycin (SRY), and **C)** erythromycin [31, 64]. Azithromycin and Erythromycin are both macrolides,  
 1289 and are also substrates of MtrD [9, 13]. Structures were sourced from the PubChem database, and pKas  
 1290 were sourced from [31, 64].

1291

1292 **S1 Table. Predicted Molecular Characteristics of AZY, SRY, and Erythromycin.**

| Molecule           | Molecular Weight (g/mol) | Topological Polar Surface Area (TPSA, Å <sup>2</sup> ) | Consensus Log P <sub>o/w</sub> | Water Solubility (Log S) | Number of H-bond acceptors | Number of H-bond Donors |
|--------------------|--------------------------|--------------------------------------------------------|--------------------------------|--------------------------|----------------------------|-------------------------|
| SRY                | 548.6                    | 344.23                                                 | -7.36                          | Highly soluble           | 12                         | 14                      |
| AZY <sub>neu</sub> | 734.96                   | 191.08                                                 | 1.15                           | Poorly soluble           | 14                         | 6                       |
| AZY <sub>h1</sub>  | 735.97                   | 191.28                                                 | 0.13                           | Poorly soluble           | 13                         | 7                       |
| AZY <sub>h2</sub>  | 736.97                   | 191.48                                                 | -0.89                          | Poorly soluble           | 12                         | 8                       |
| ERY <sub>neu</sub> | 733.92                   | 193.91                                                 | 1.99                           | Soluble                  | 14                         | 5                       |
| ERY <sub>h1</sub>  | 734.93                   | 195.11                                                 | 0.97                           | Soluble                  | 13                         | 6                       |

1293 The physicochemical descriptors and properties of the three different protonation states of AZY, the single  
 1294 protonation state of SRY, and the two protonation states of erythromycin, were calculated using the SWISS-  
 1295 ADME server [65]. The consensus Log P is the average of the calculated LogP using five different methods.  
 1296 The Log S indicates the predicted solubility in water. SWISS-ADME presents three different predictions  
 1297 of Log S each using different methodology, with the potential classifications ‘highly soluble’, ‘soluble’,  
 1298 and ‘poorly soluble’. For each form of AZY, 2/3 methods predicted “poorly soluble”, the remaining method  
 1299 (SILICOS-IT) predicted “soluble”. For SRY, 2/3 methods predicted “highly soluble”, the remaining  
 1300 method (SILICOS-IT) predicted “soluble”. The Topological Polar Surface Area (TPSA) indicates the  
 1301 surface sum over all polar atoms in the respective molecule in Å<sup>2</sup>; as TPSA increases, hydrophilicity  
 1302 increases.

1303

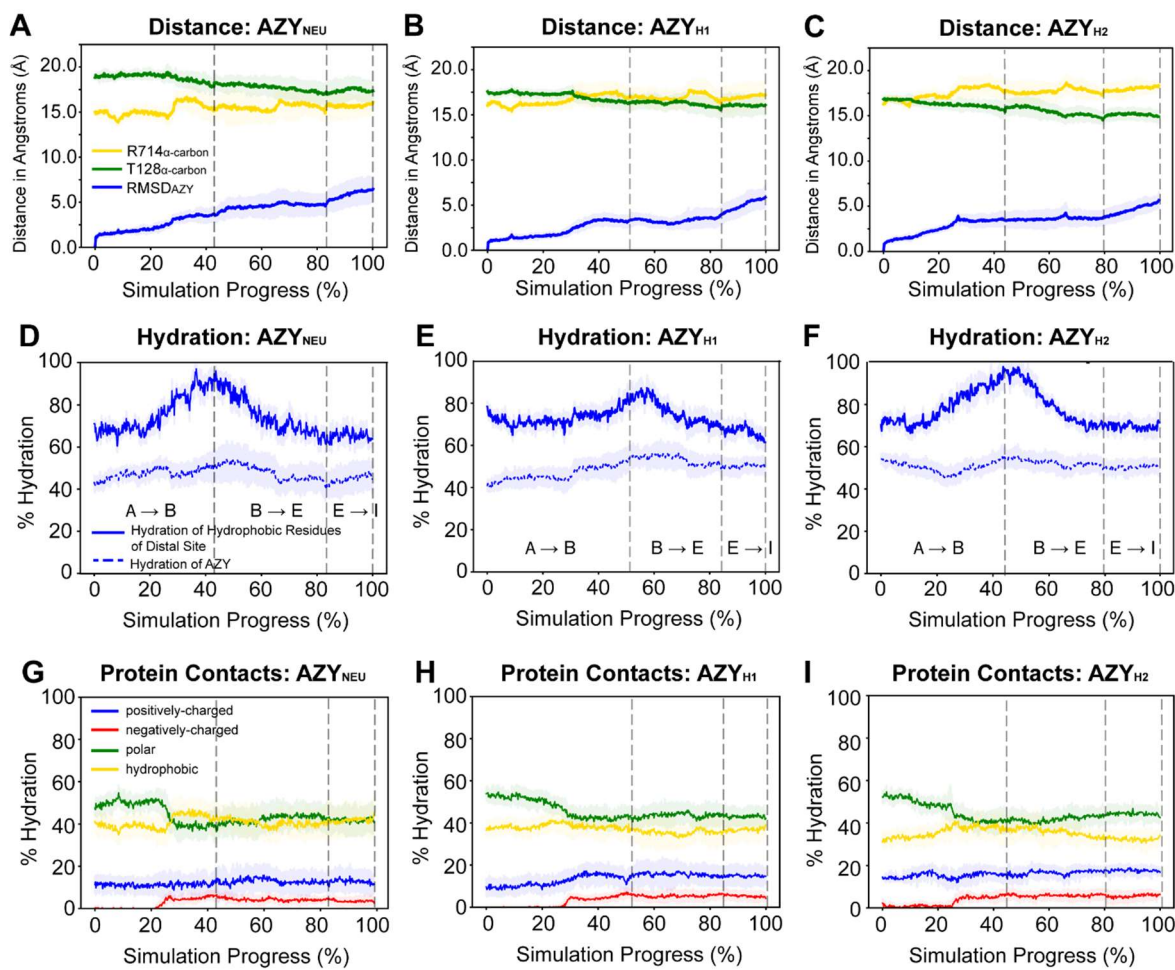

1304

1305 **S5 Fig. Results of the “Non-Transport” Cluster – TMD Simulations of AZY at Site 1.** A-C) show the  
 1306 RMSD of AZY from its starting position over time, and the distance between the center of mass of AZY  
 1307 and the  $\alpha$ -carbons of T128 or R714 in the periplasmic cleft. In contrast to the results in Fig 3, notice that  
 1308 the  $RMSD_{AZY}$  is  $< 10 \text{ \AA}$ , and the distance between AZY and the two checkpoints within the cleft (R714,  
 1309 T128) does not change as much as in the ‘Transport’ cluster. D-F) show the hydration of AZY or of the  
 1310 hydrophobic residues in the distal binding site over the course of the simulation. Percent (%) hydration is  
 1311 calculated as the number of molecules within  $4 \text{ \AA}$  of AZY or the hydrophobic residues, divided by the total  
 1312 number of water molecules needed to hydrate them completely. G-I) show the nature of protein-AZY  
 1313 contacts over the course of the simulation. In A-I), data are presented as the mean with  $\pm$  one standard  
 1314 deviation in shading. Dashed grey lines indicate structural checkpoints, and timepoints between the lines  
 1315 indicate structural transitions.

1316

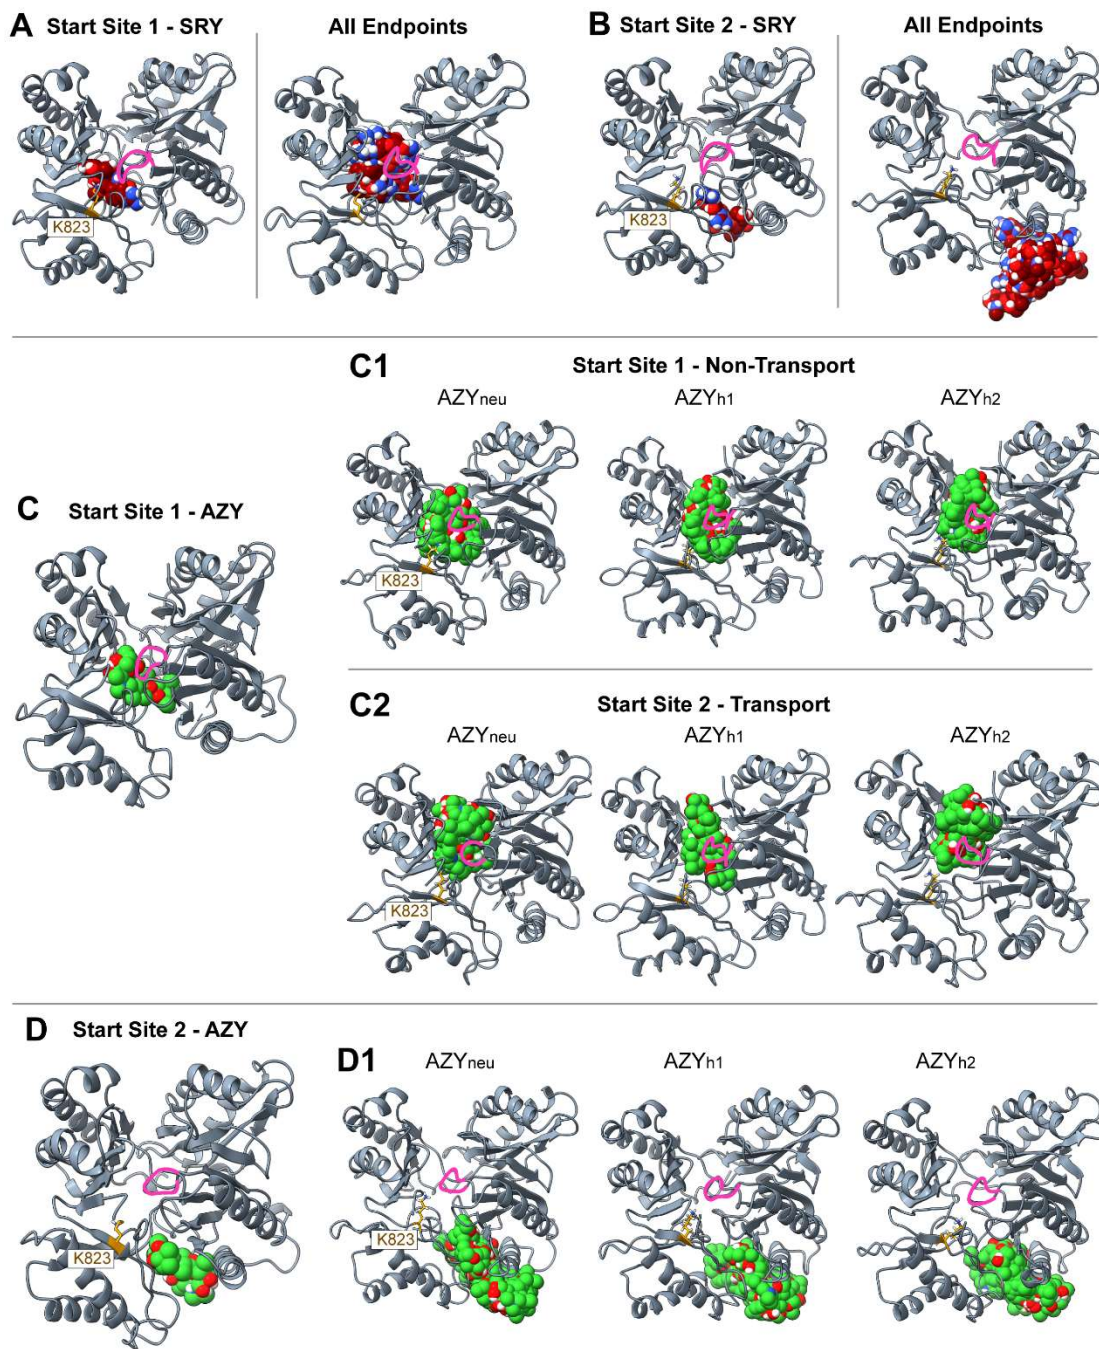

1317

1318 **S6 Fig. All Simulation Starting Points and Ending Points for TMD Simulations with AZY and SRY.**

1319 All panels show the periplasmic cleft of MtrD viewed from the top down. The G-Loop is outlined in  
 1320 magenta, K823 is orange and in licorice representation, SRY and AZY are in spacefill representation, AZY  
 1321 is in lime green, and SRY is in maroon. Panels **A) and B)** show the starting position of SRY at **A)** Starting  
 1322 Site 1 and **B)** Starting Site 2. The left image shows SRY in its starting position. The right image shows all  
 1323 of the ending positions of SRY superimposed,  $n = 20$  simulations per starting site. **C)** shows the results of  
 1324 simulations with AZY from Starting Site 1; **C1)** shows the ending position of AZY in all ‘Non-Transport’  
 1325 trajectories, and **C2)** shows the ending position of AZY in all ‘Transport’ trajectories. **D)** shows the results  
 1326 of simulations with AZY from Starting Site 2; **D1)** shows the ending position of AZY divided by  
 1327 protonation state,  $n = 20$  simulations per ligand. Note that, in contrast to the results of SRY at Site 2 (Panel  
 1328 **B)**, AZY is still within the entrance of the periplasmic cleft in the majority of the simulations, whereas SRY  
 1329 had exited the periplasmic cleft completely.

1330



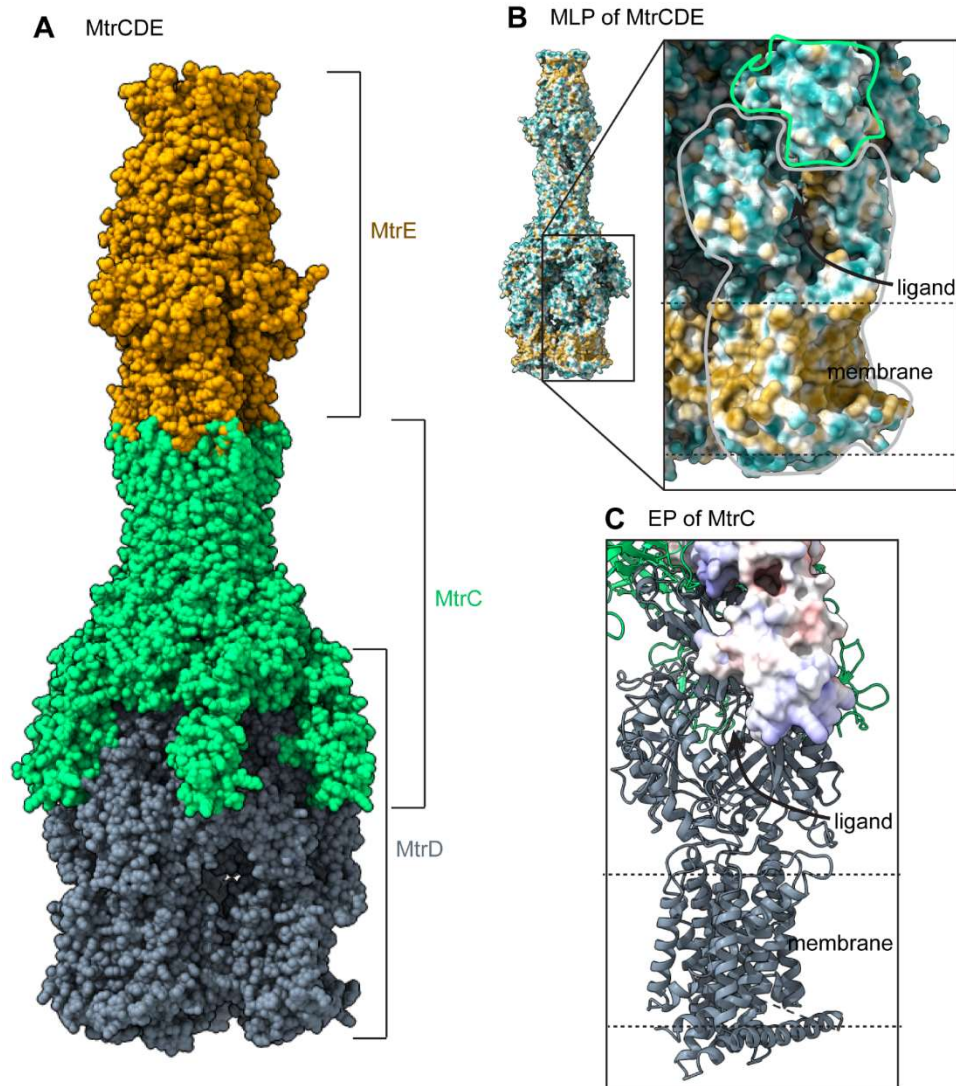

1331  
1332

1333 **S7 Fig. Homology Model of MtrCDE.** A) shows our fully assembled homology model of MtrCDE; the model was assembled using  
1334 the 5NG5 structure of AcrAB-TolC as a structural template (see Methods) [41]. B) The MLP (molecular lipophilicity potential) of  
1335 MtrCDE; the zoom-in panel shows the interface between MtrC (outlined in green) and MtrD (outlined in grey). C) The electrostatic  
1336 potential (EP) surfaces of MtrC calculated by the PDB2PQR server. The MtrC-MtrD interface (that could potentially contact  
1337 ligands) contains mostly neutral MLP and EP isosurfaces.

1338

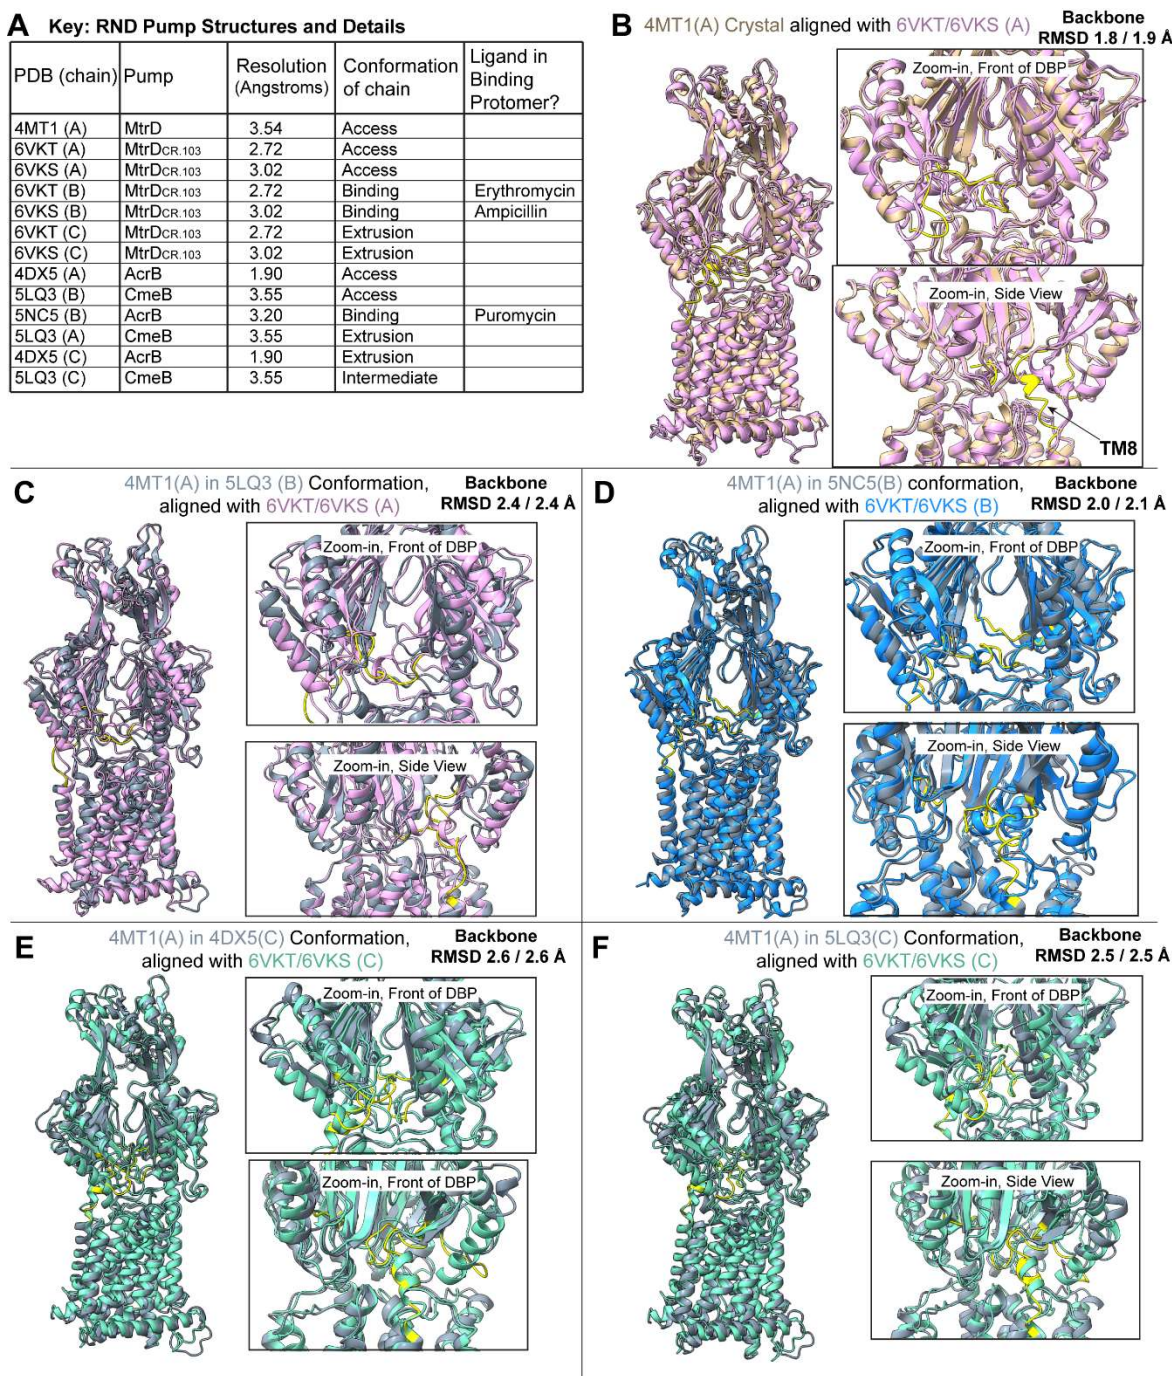

1339

1340 **S8 Fig. Alignment and Backbone RMSD Comparison of MtrD with Known Structures of**  
 1341 **Homologous RND Transporters and with MtrD<sub>CR103</sub>.** A) A table showing the PDB ID (chain ID), pump  
 1342 of origin, resolution, conformational class, and ligand present (if any). B) MtrD (4MT1, tan)  
 1343 aligned with the Access protomers of 6VKT/6VKS of MtrD<sub>CR103</sub> (purple). C) MtrD post-TMD  
 1344 guidance to the Access conformation of CmeB (gray), aligned with the Access protomers of  
 1345 6VKT/6VKS (purple). D) MtrD post-TMD guidance to the Binding conformation of AcrB (gray),  
 1346 aligned with the Binding protomers of 6VKT/6VKS (blue). E) MtrD post-TMD guidance to  
 1347 the Extrusion conformation of AcrB (gray), aligned with the Extrusion protomers of  
 1348 6VKT/6VKS (green). F) MtrD post-TMD guidance to the “Intermediate” conformation of  
 1349 CmeB (gray), aligned with the Extrusion protomers of 6VKT/6VKS (green). Alignments  
 and RMSD calculations were performed with the RMSD Trajectory tool in VMD [48].
